# Supplementary material for: Indium(iii) complexes with Schiff base-derived polydentate ligands: chemotherapeutic, radiochemotherapeutic, and radiosensitizer potentials against breast tumor cells
Source: Royal Society of Chemistry journal article supplement (doi:10.1039/d4nj05004e), 2024-12-06
Supplement: d4nj05004e1.pdf [file d4nj05004e1.pdf]

## Supplementary Information

### **Indium(III) complexes with Schiff base-derived polydentate ligands: chemotherapeutic, radiochemotherapeutic, and radiosensitizer potentials against breast tumor cells**

Andrea R. Aguirre<sup>a</sup>, Gabrieli L. Parrilha<sup>a</sup>, Gabriel Henrique C. Braga<sup>a</sup>, Raquel G. Dos Santos<sup>\*b</sup>, Heloisa Beraldo<sup>\*a</sup>.

<sup>a</sup> Departamento de Química, Universidade Federal de Minas Gerais, 31.270-901, Belo Horizonte, Brazil.

<sup>b</sup> Centro de Desenvolvimento da Tecnologia Nuclear, 31.270-901, Belo Horizonte, Brazil.

#### **Table of contents**

|                                                                                                                                                                                               |    |
|-----------------------------------------------------------------------------------------------------------------------------------------------------------------------------------------------|----|
| Scheme S1. General scheme for the synthesis of indium(III) complexes ( <b>1-5</b> )                                                                                                           | 2  |
| Thermogravimetry                                                                                                                                                                              | 2  |
| Infrared Spectra.                                                                                                                                                                             | 4  |
| NMR spectra.                                                                                                                                                                                  | 7  |
| MALDI-TOF Mass spectra                                                                                                                                                                        | 17 |
| Stability studies in PBS/DMSO solution                                                                                                                                                        | 20 |
| Table S1. Comparison of radiochemotherapy, <sup>114m</sup> In(III) radiation monotherapy, combined In(III) chemotherapy + radiation monotherapy, in MCF-7 and MDA-MB-231 breast cancer cells. | 22 |

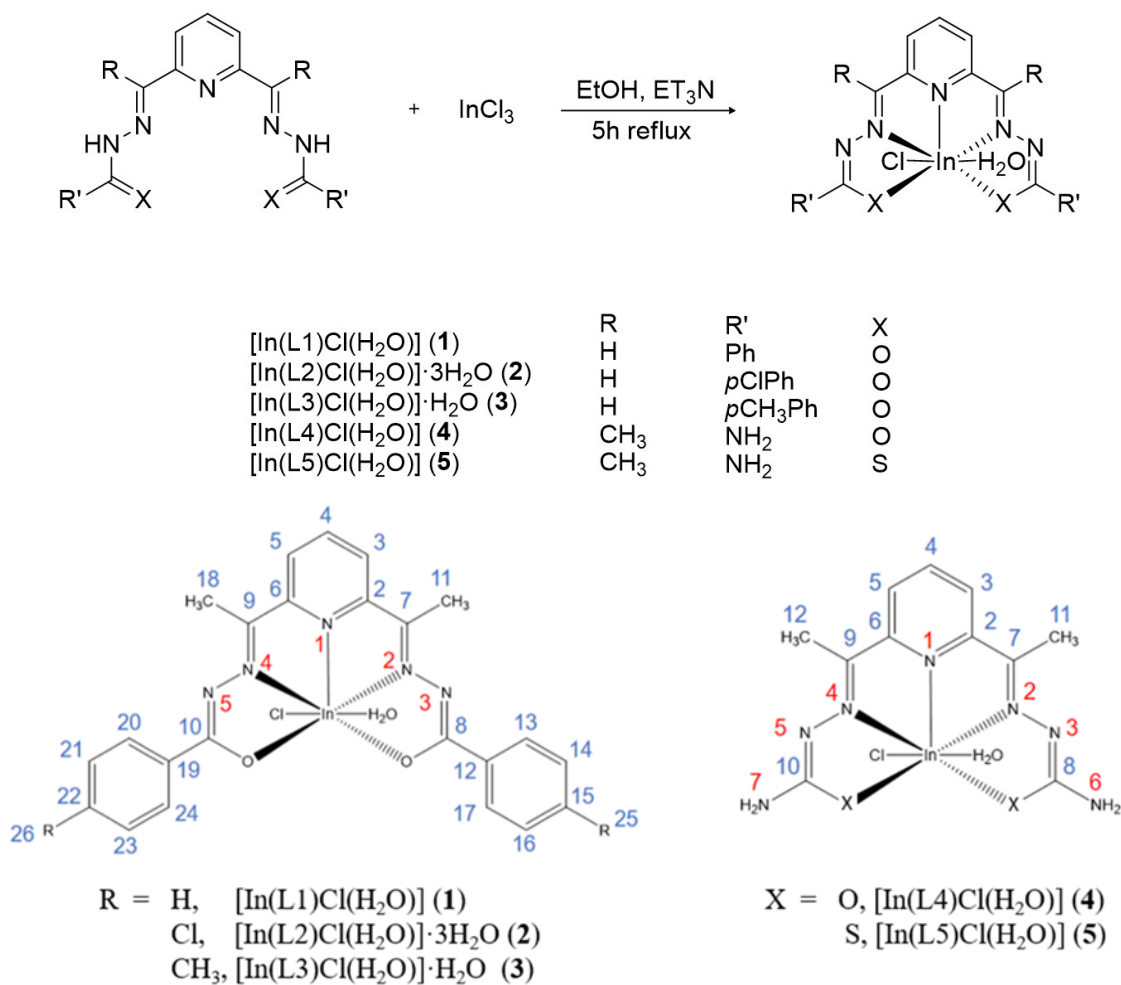

**Scheme S1.** General scheme for the synthesis of indium(III) complexes **1-5** and atom numbering for complexes **1-5**

### Thermogravimetry

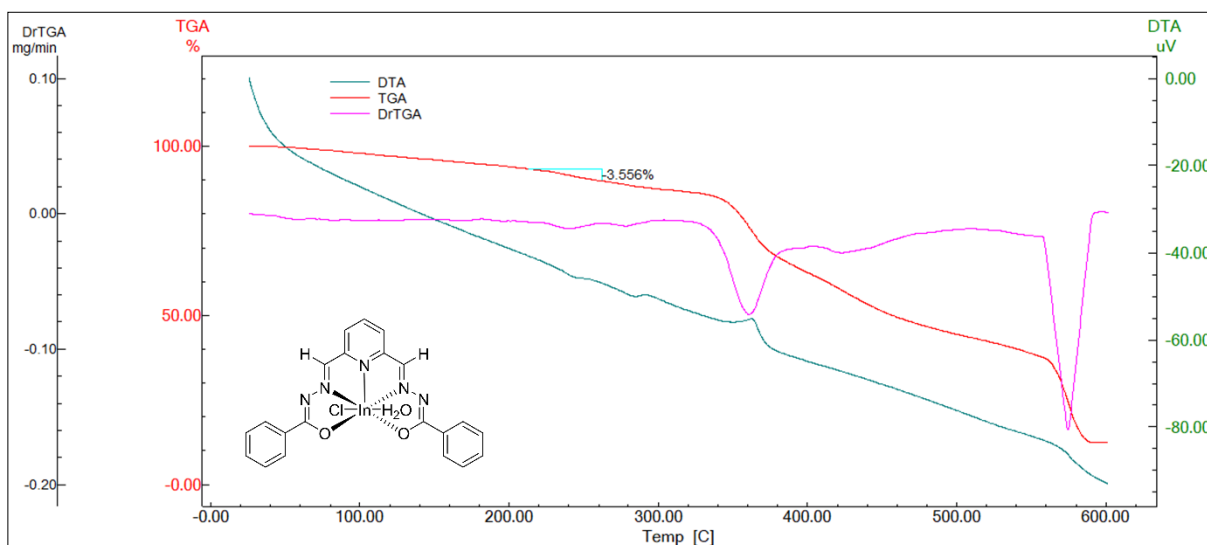

**Figure S1.** Thermogravimetry of complex [In(L1)Cl(H<sub>2</sub>O)] (**1**)

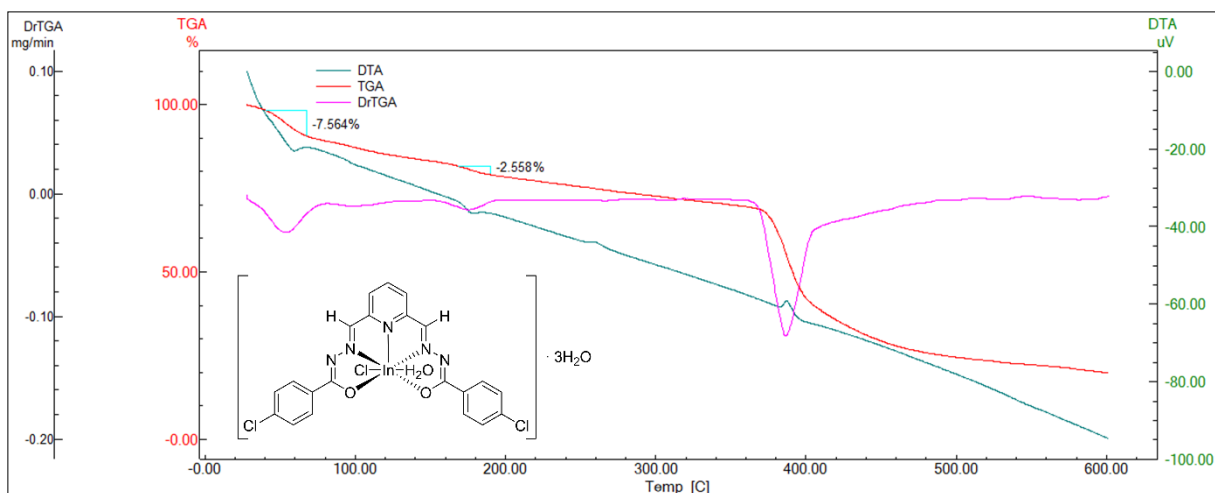

**Figure S2.** Thermogravimetry of complex  $[\text{In}(\text{L}2)\text{Cl}(\text{H}_2\text{O})] \cdot 3\text{H}_2\text{O}$  (2)

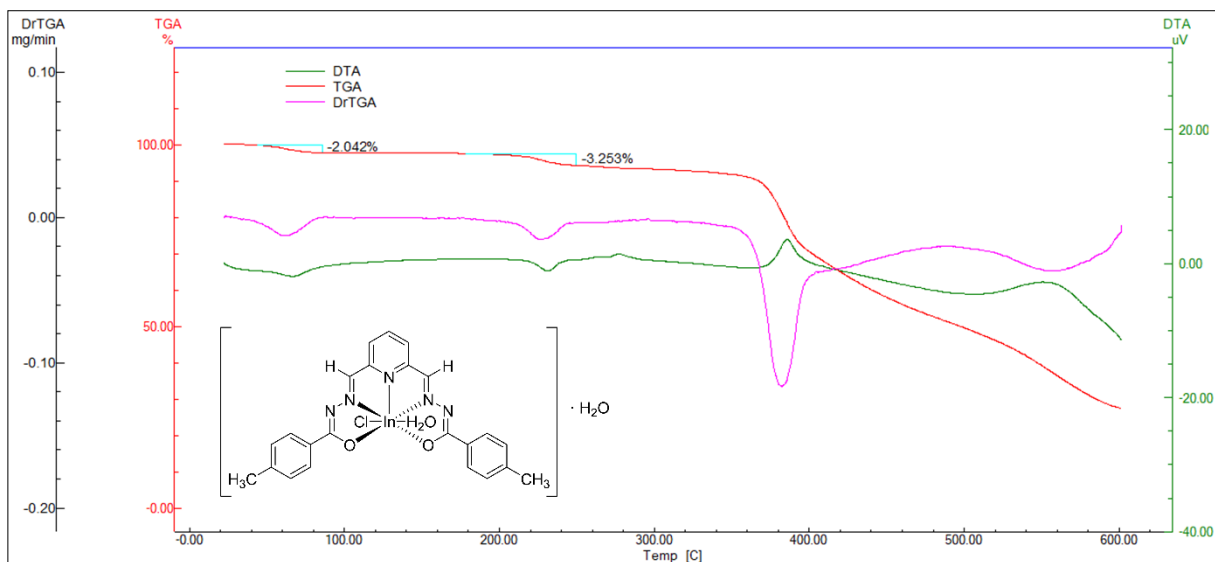

**Figure S3.** Thermogravimetry of complex  $[\text{In}(\text{L}3)\text{Cl}(\text{H}_2\text{O})] \cdot \text{H}_2\text{O}$  (3)

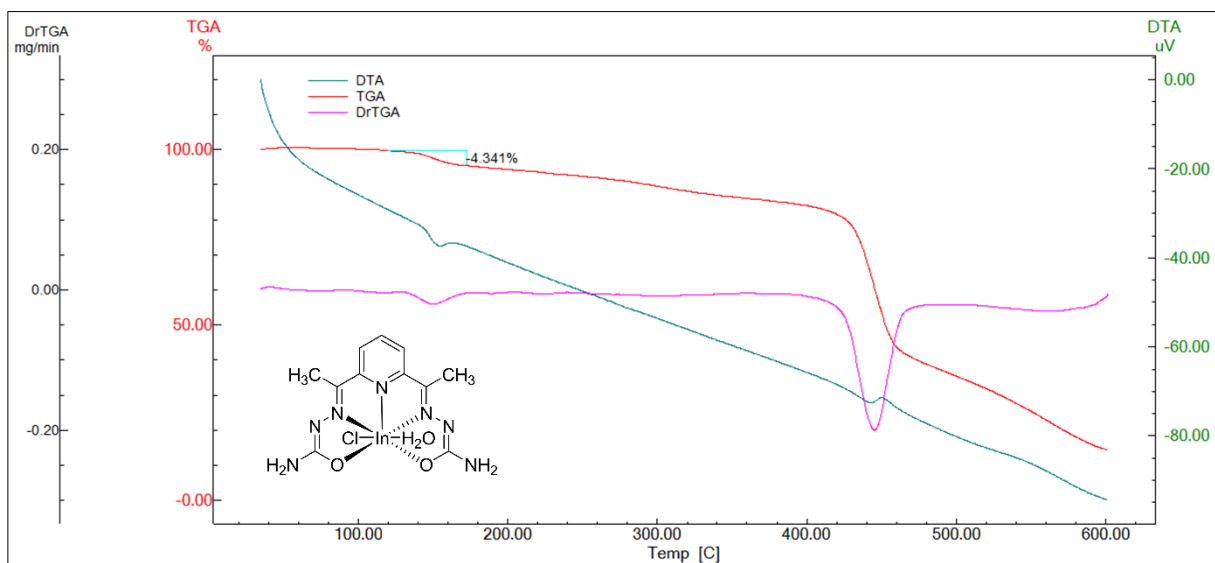

**Figure S4.** Thermogravimetry of complex  $[\text{In}(\text{L}4)\text{Cl}(\text{H}_2\text{O})]$  (4)

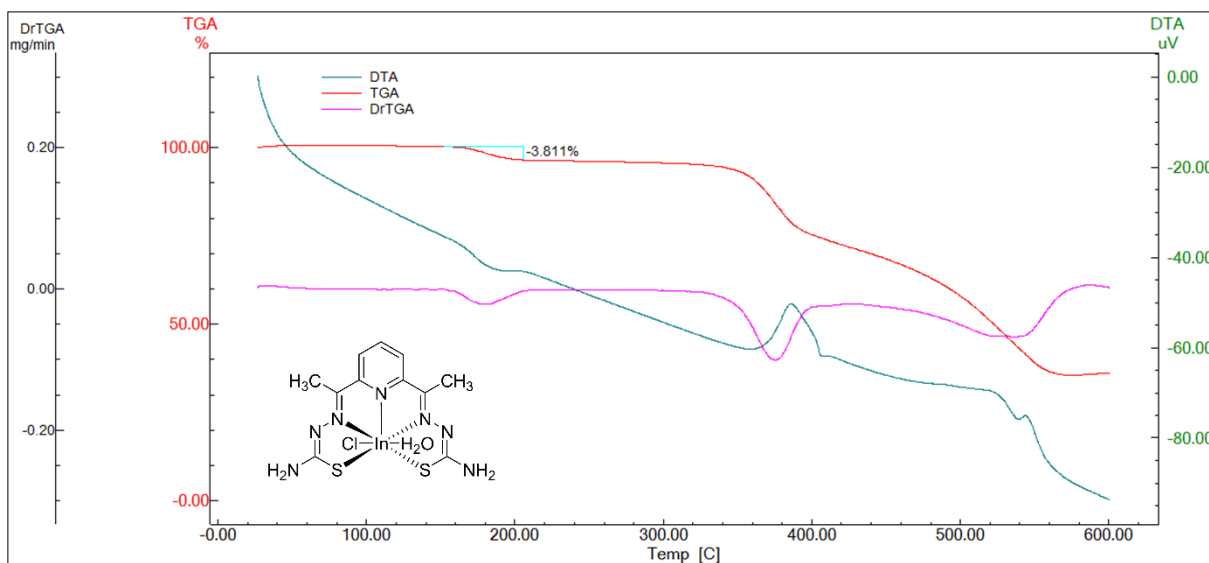

### Infrared Spectra

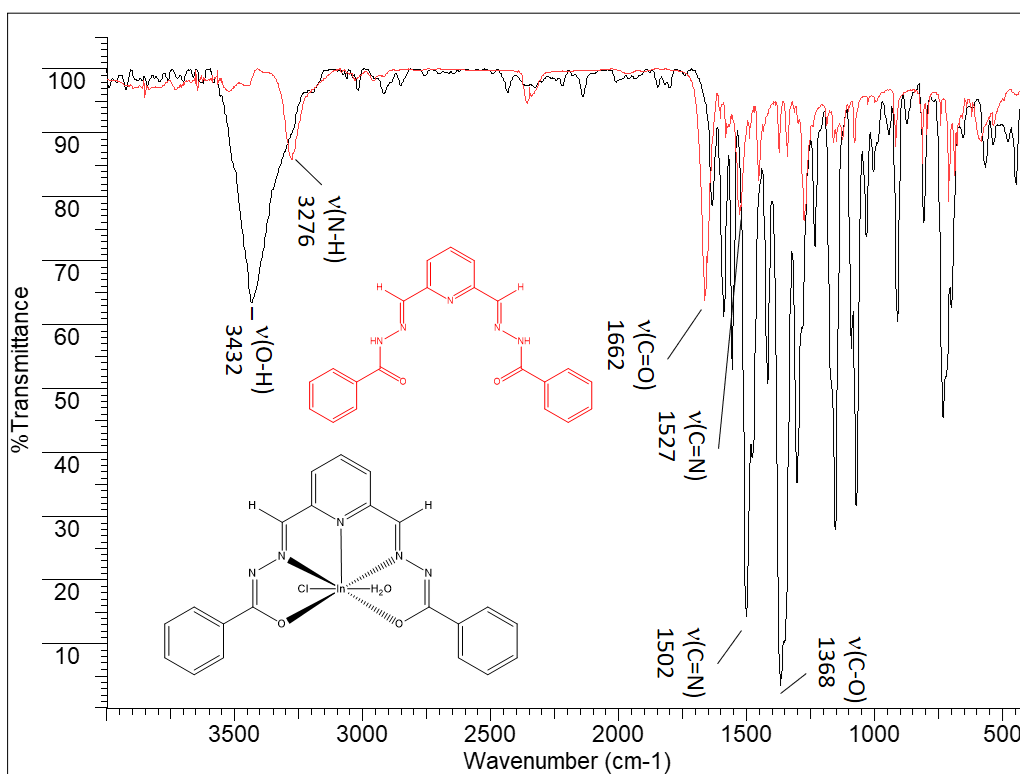

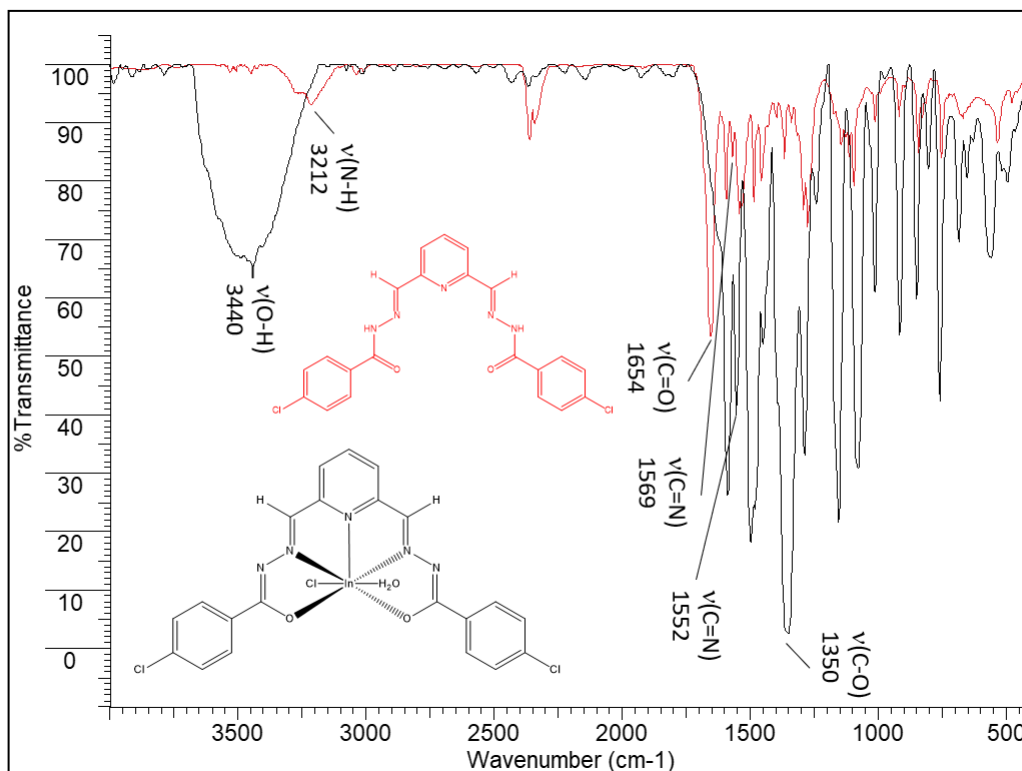

**Figure S7.** Infrared spectra of  $\text{H}_2\text{L}_2$  and complex  $[\text{In}(\text{L}_2)\text{Cl}(\text{H}_2\text{O})] \cdot 3\text{H}_2\text{O}$  (**2**)

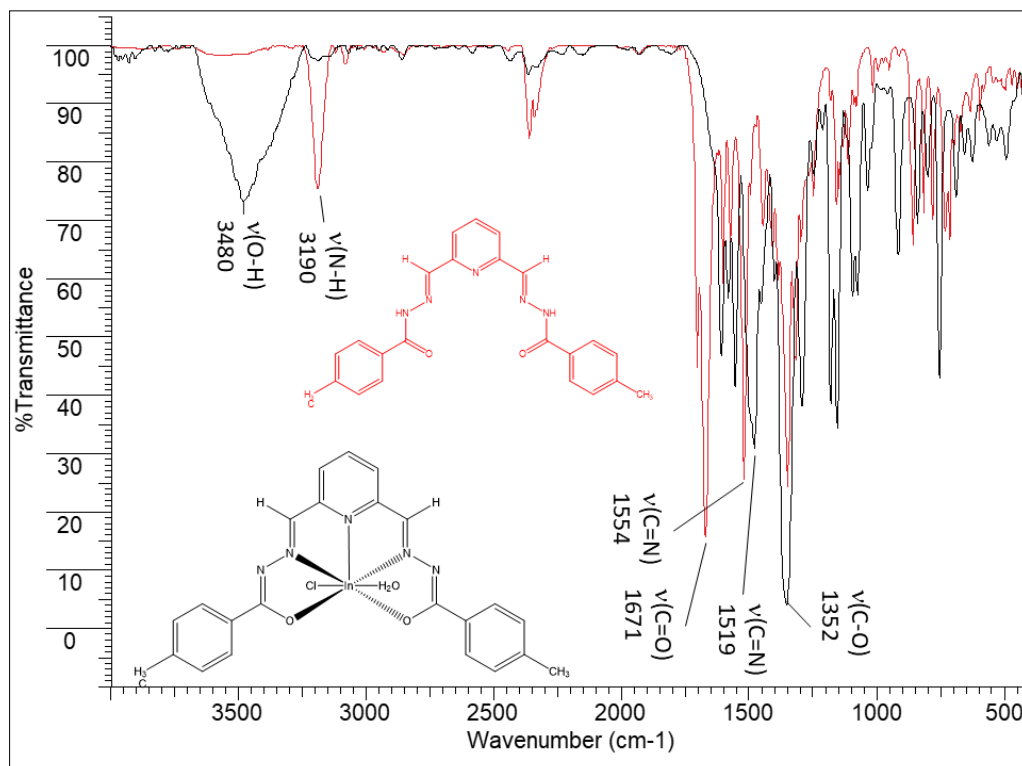

**Figure S8.** Infrared spectra of  $\text{H}_2\text{L}_3$  and complex  $[\text{In}(\text{L}_3)\text{Cl}(\text{H}_2\text{O})] \cdot \text{H}_2\text{O}$  (**3**)

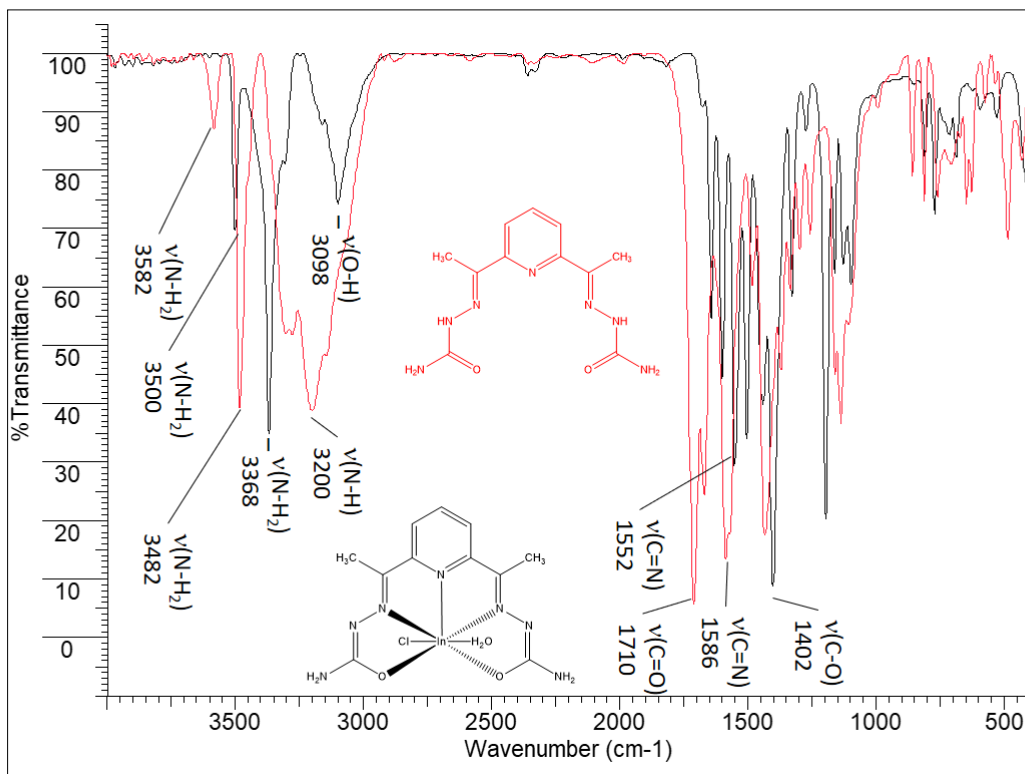

**Figure S9.** Infrared spectra of  $H_2L4$  and complex  $[In(L4)Cl(H_2O)]$  (4)

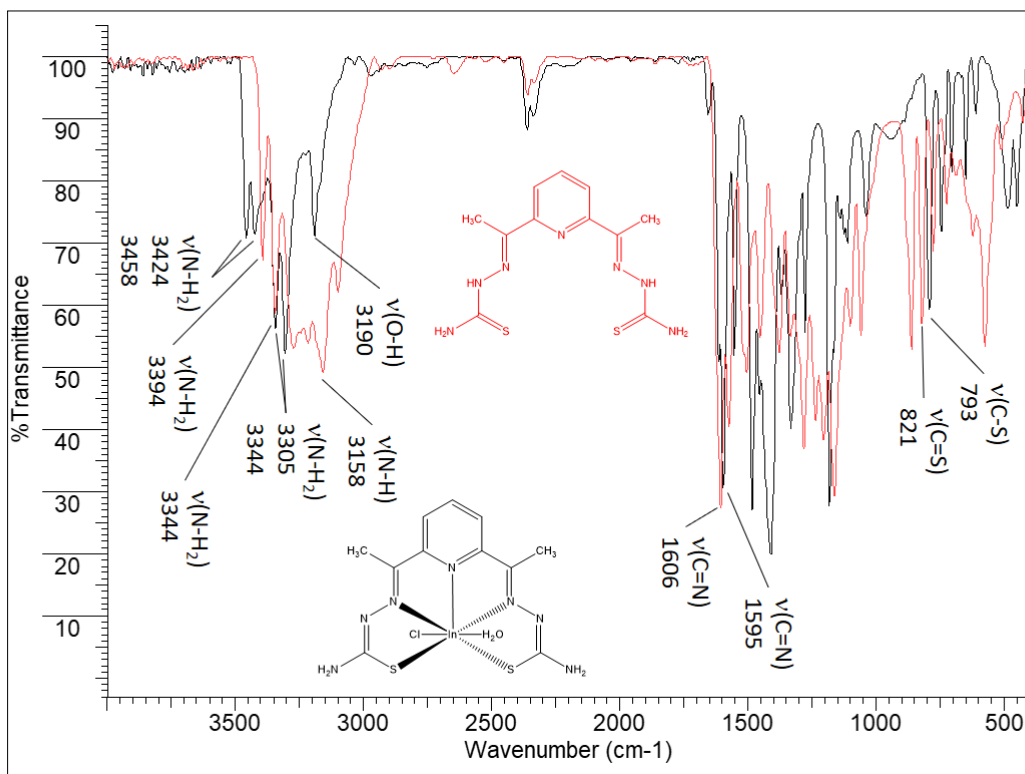

**Figure S10.** Infrared spectra of  $H_2L5$  and complex  $[In(L5)Cl(H_2O)]$  (5)

## NMR Spectra

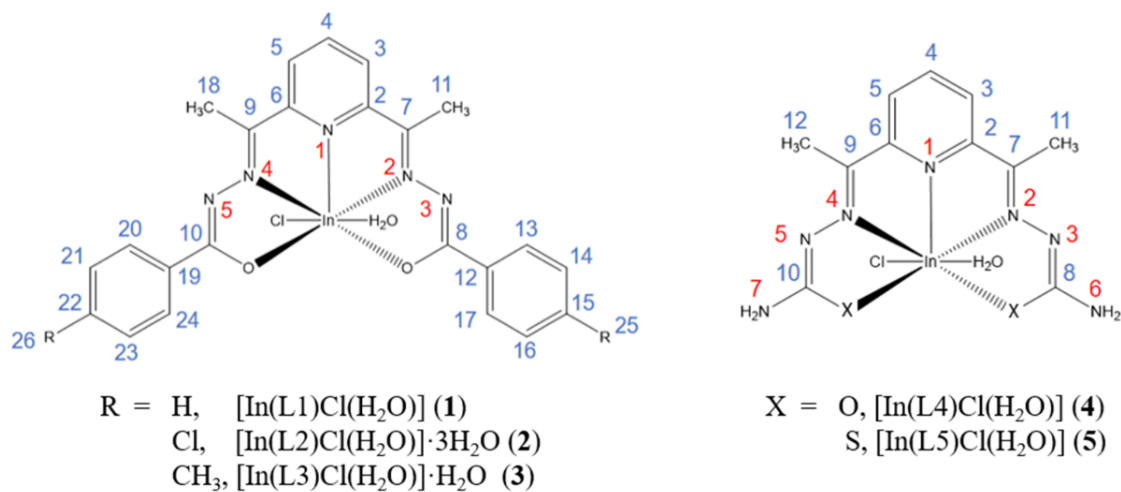

**Figure S11.** Structural representation of indium(III) complexes **1-5** with atom numbering

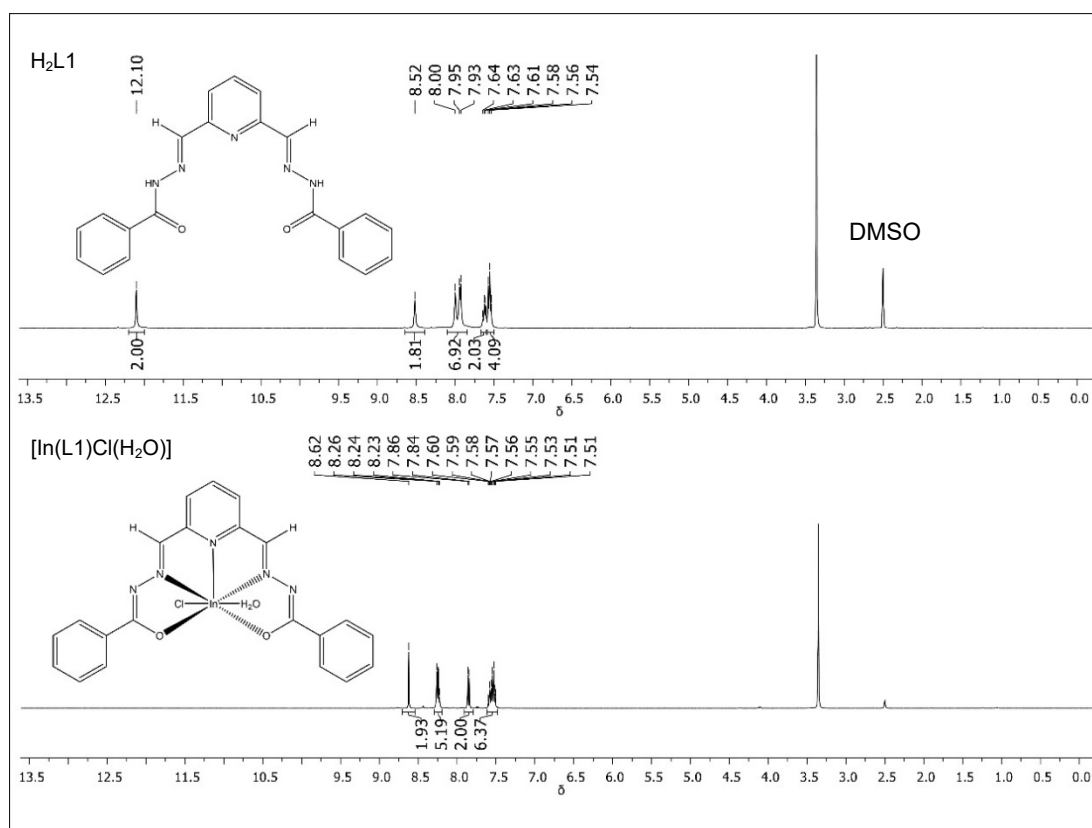

**Figure S12.**  $^1\text{H}$  NMR spectra of  $\text{H}_2\text{L1}$  and complex  $[\text{In}(\text{L1})\text{Cl}(\text{H}_2\text{O})] \text{ (1)}$

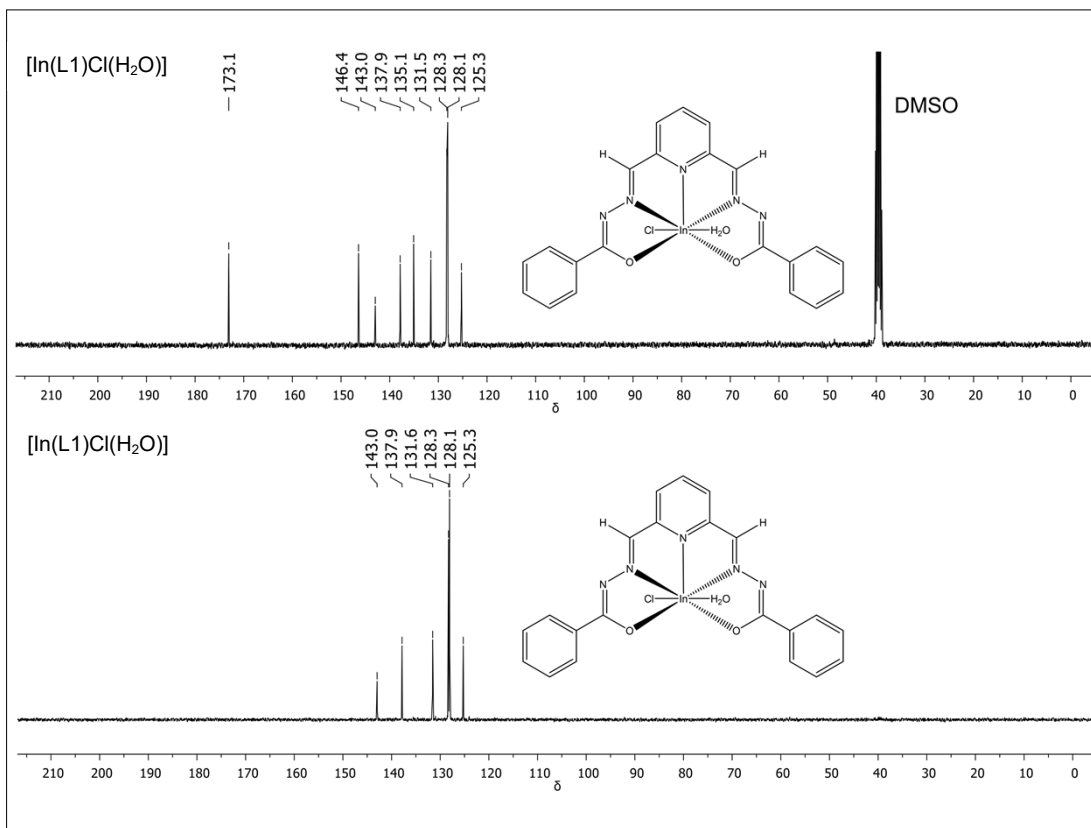

**Figure S13.**  $^{13}\text{C}\{^1\text{H}\}$  and DEPT-135 NMR spectra of complex  $[\text{In}(\text{L1})\text{Cl}(\text{H}_2\text{O})]$  (**1**)

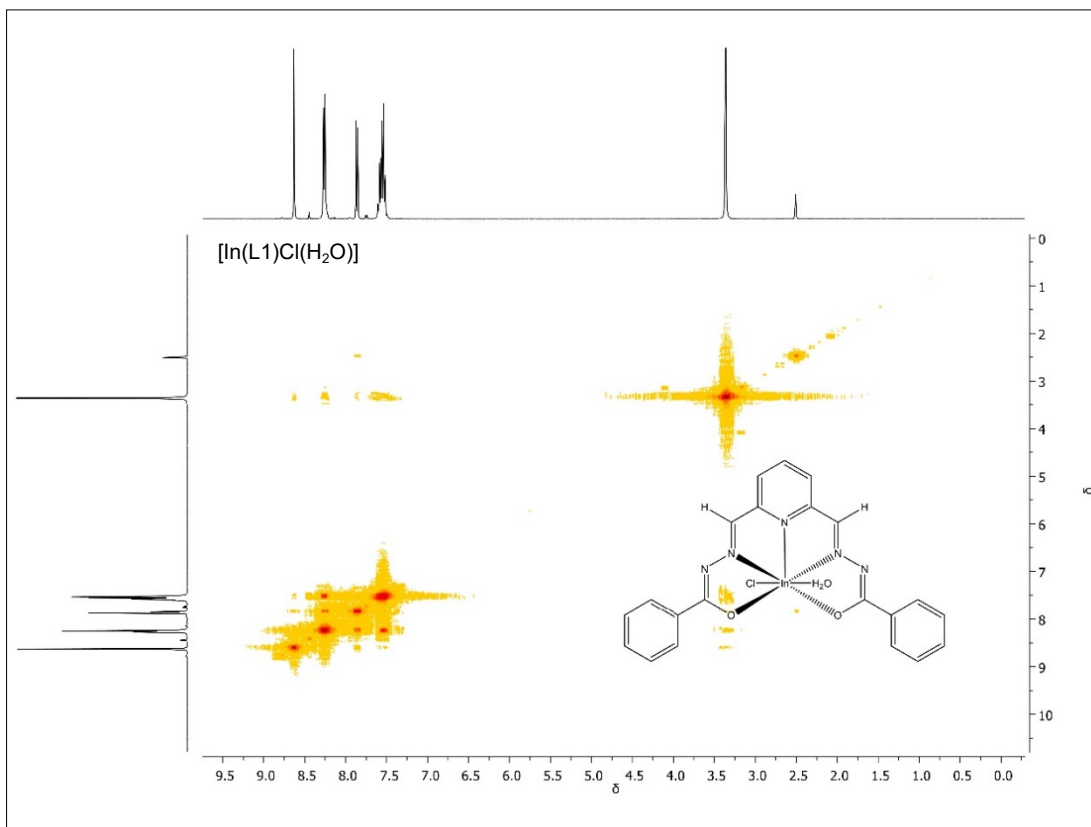

**Figure S14.** COSY NMR spectrum of complex  $[\text{In}(\text{L1})\text{Cl}(\text{H}_2\text{O})]$  (**1**)



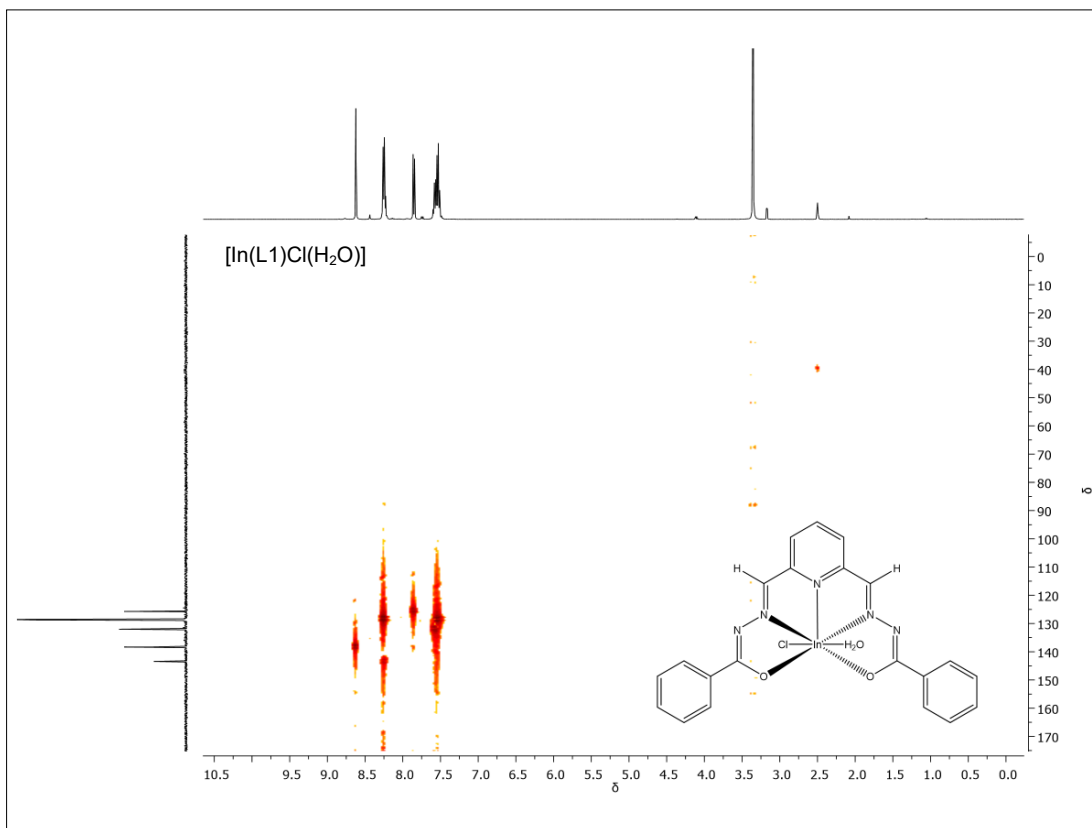

**Figure S15.** HMQC NMR spectrum of complex  $[\text{In}(\text{L1})\text{Cl}(\text{H}_2\text{O})]$  (**1**)

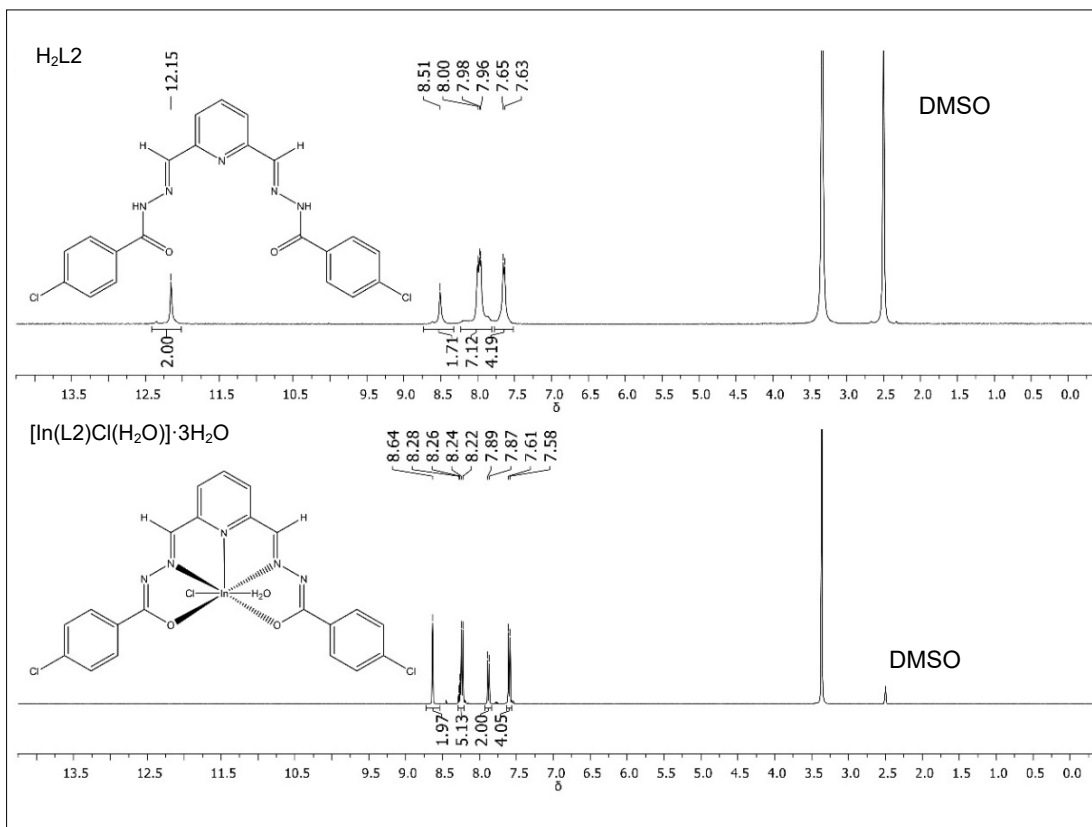

**Figure S16.**  $^1\text{H}$  NMR spectra of  $\text{H}_2\text{L2}$  and complex  $[\text{In}(\text{L2})\text{Cl}(\text{H}_2\text{O})]\cdot 3\text{H}_2\text{O}$  (**2**)

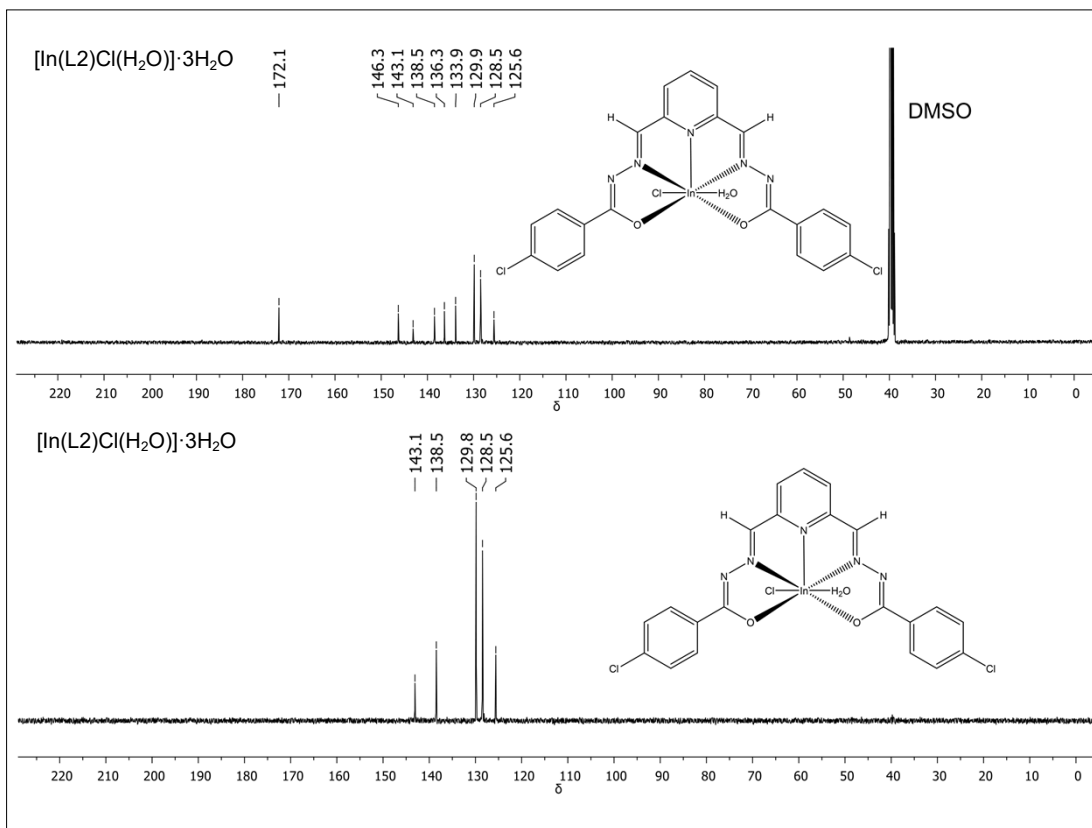

**Figure S17.**  $^{13}\text{C}\{^1\text{H}\}$  and DEPT-135 NMR spectra of complex  $[\text{In}(\text{L}2)\text{Cl}(\text{H}_2\text{O})]\cdot 3\text{H}_2\text{O}$  (2)

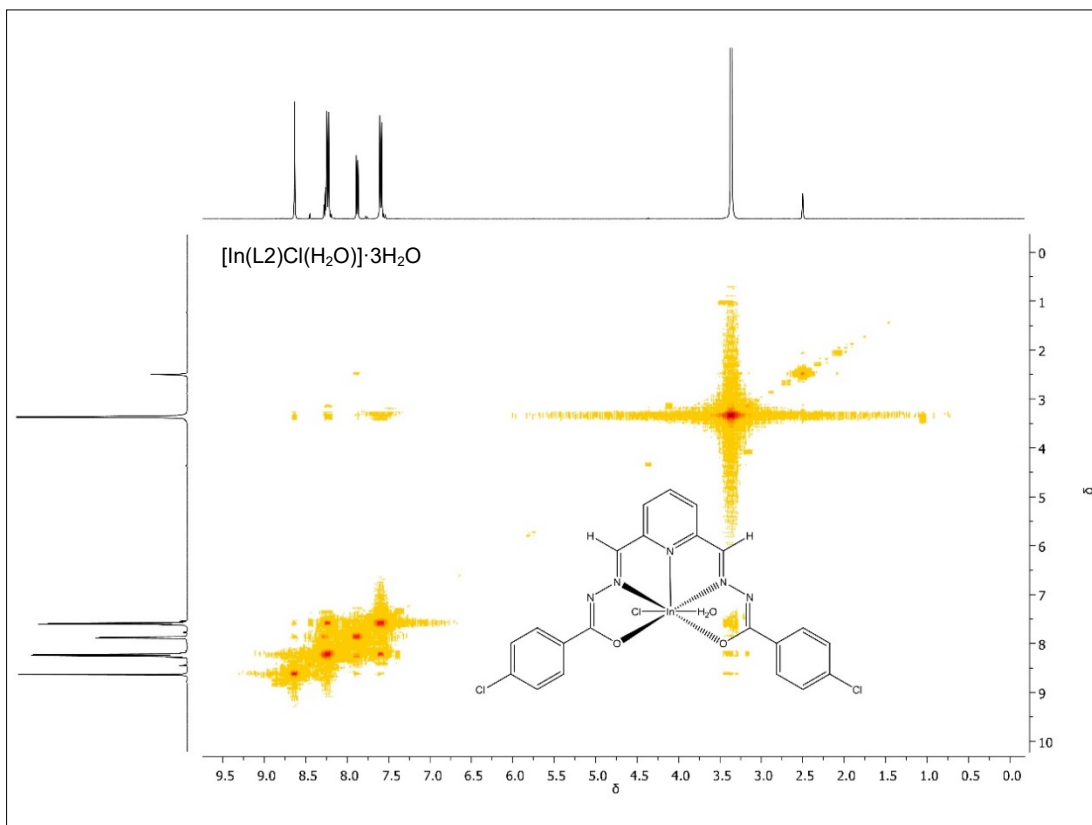

**Figure S18.** COSY NMR spectrum of complex  $[\text{In}(\text{L}2)\text{Cl}(\text{H}_2\text{O})]\cdot 3\text{H}_2\text{O}$  (2)

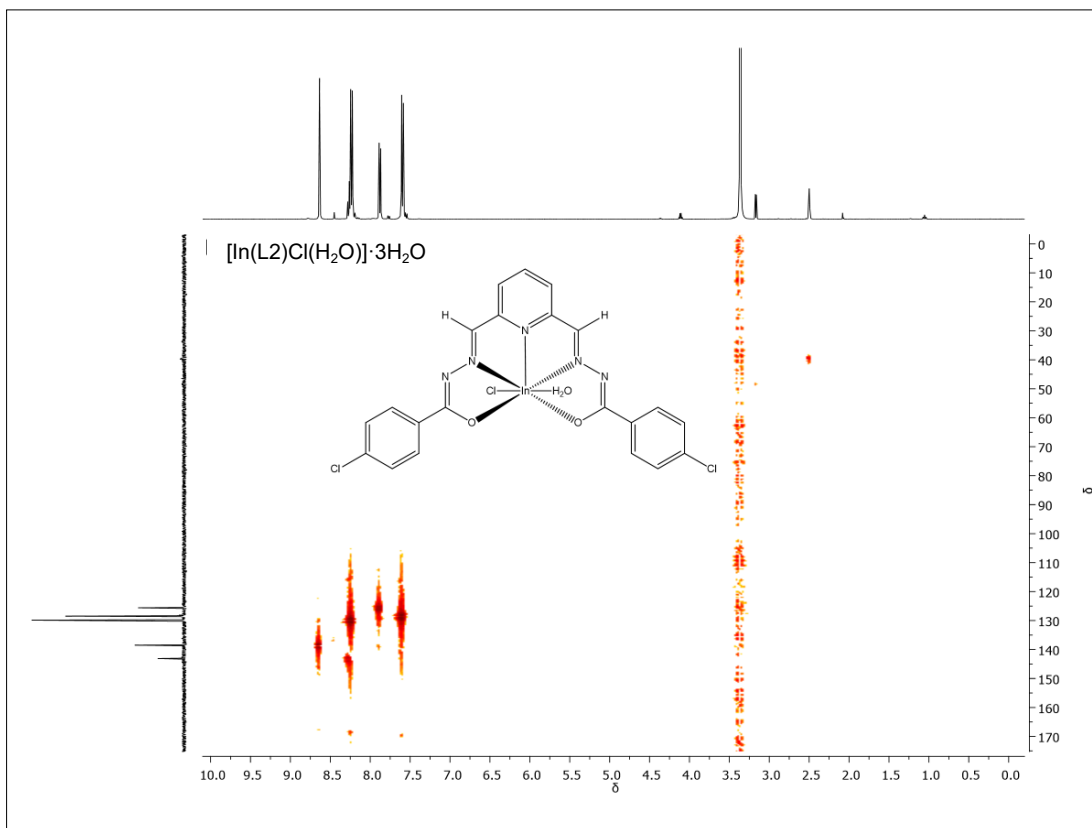

Figure S19. HMQC NMR spectrum of complex  $[\text{In}(\text{L}2)\text{Cl}(\text{H}_2\text{O})]\cdot 3\text{H}_2\text{O}$  (2)

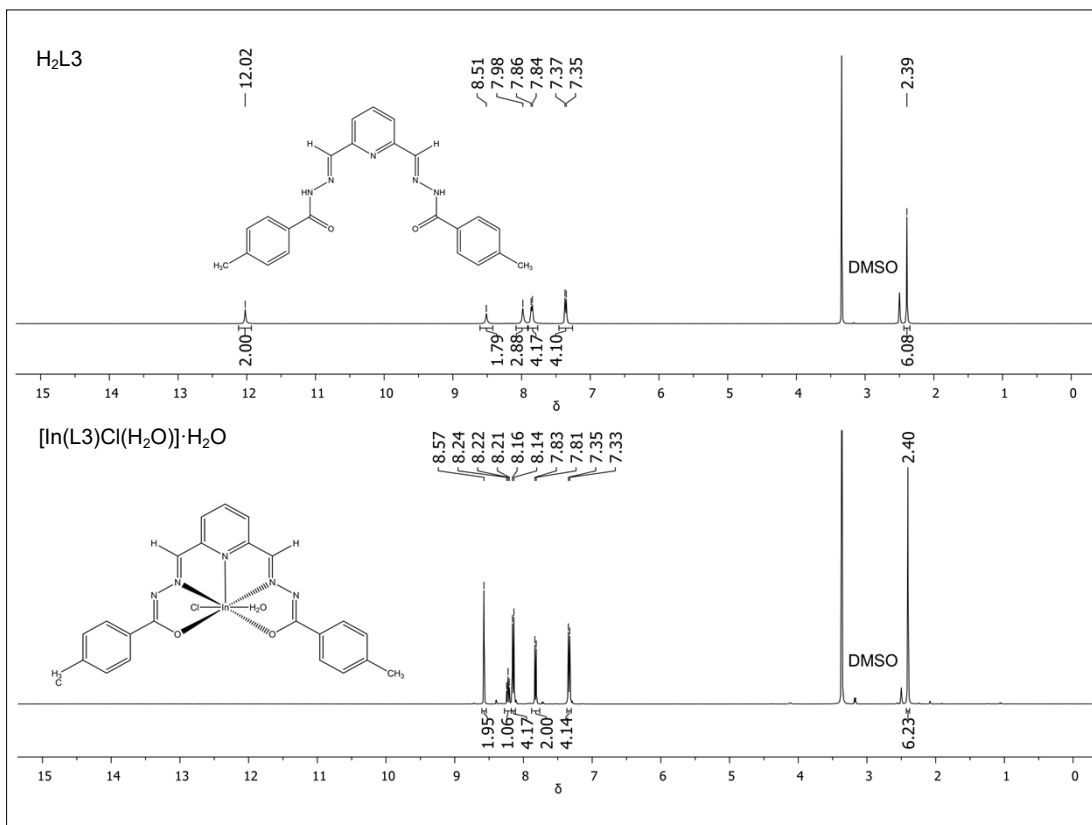

Figure S20.  $^1\text{H}$  NMR spectra of  $\text{H}_2\text{L}3$  and complex  $[\text{In}(\text{L}3)\text{Cl}(\text{H}_2\text{O})]\cdot \text{H}_2\text{O}$  (3)

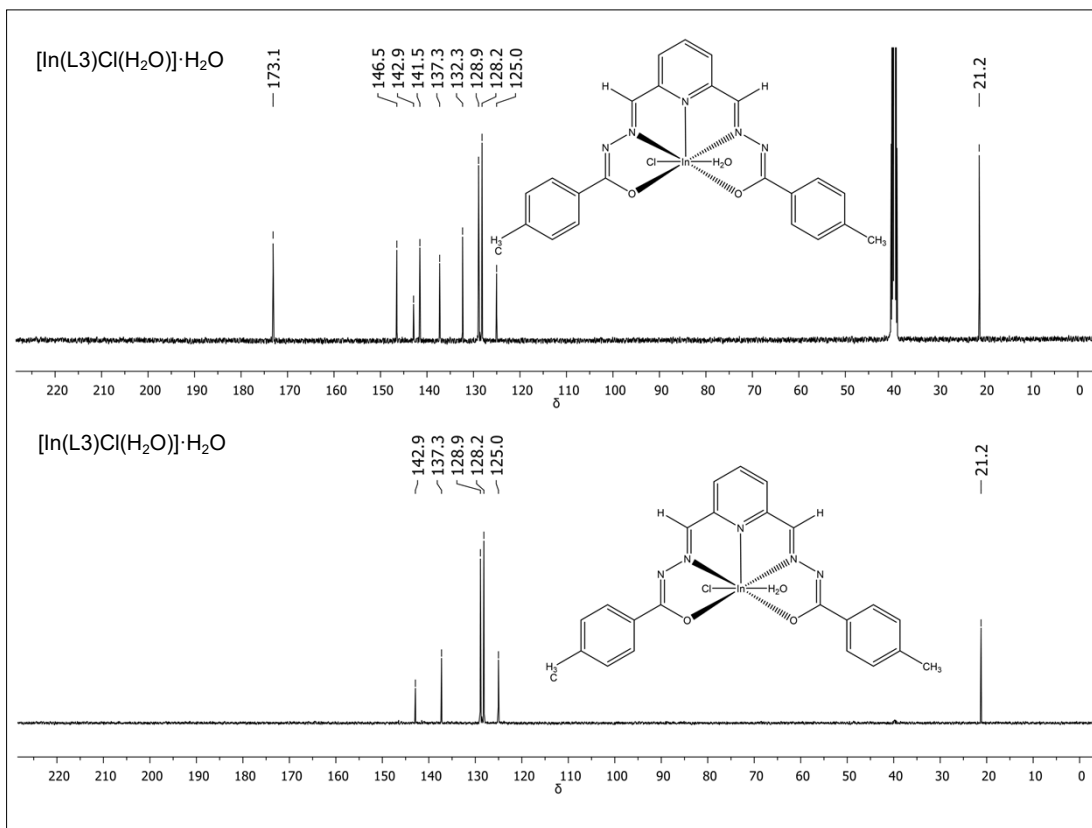

**Figure S21.**  $^{13}\text{C}\{^1\text{H}\}$  and DEPT-135 NMR spectra of complex  $[\text{In}(\text{L}3)\text{Cl}(\text{H}_2\text{O})]\cdot\text{H}_2\text{O}$  (**3**)

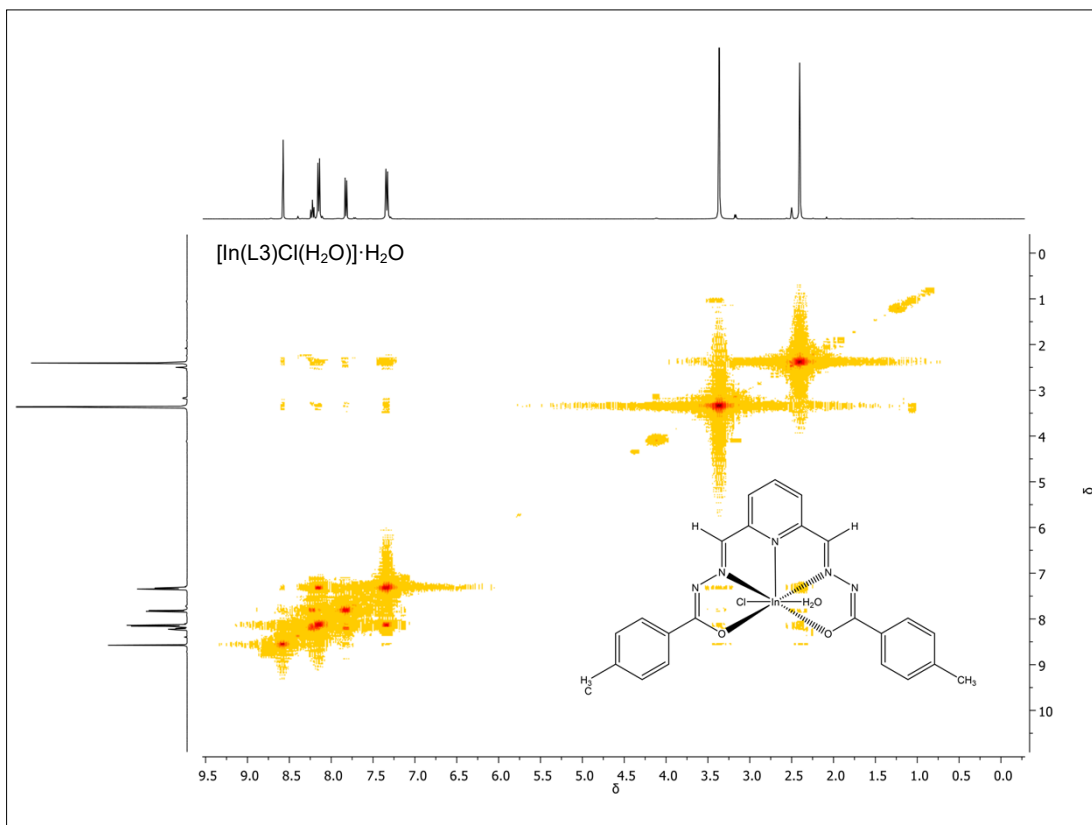

**Figure S22.** COSY NMR spectrum of complex  $[\text{In}(\text{L}3)\text{Cl}(\text{H}_2\text{O})]\cdot\text{H}_2\text{O}$  (**3**)

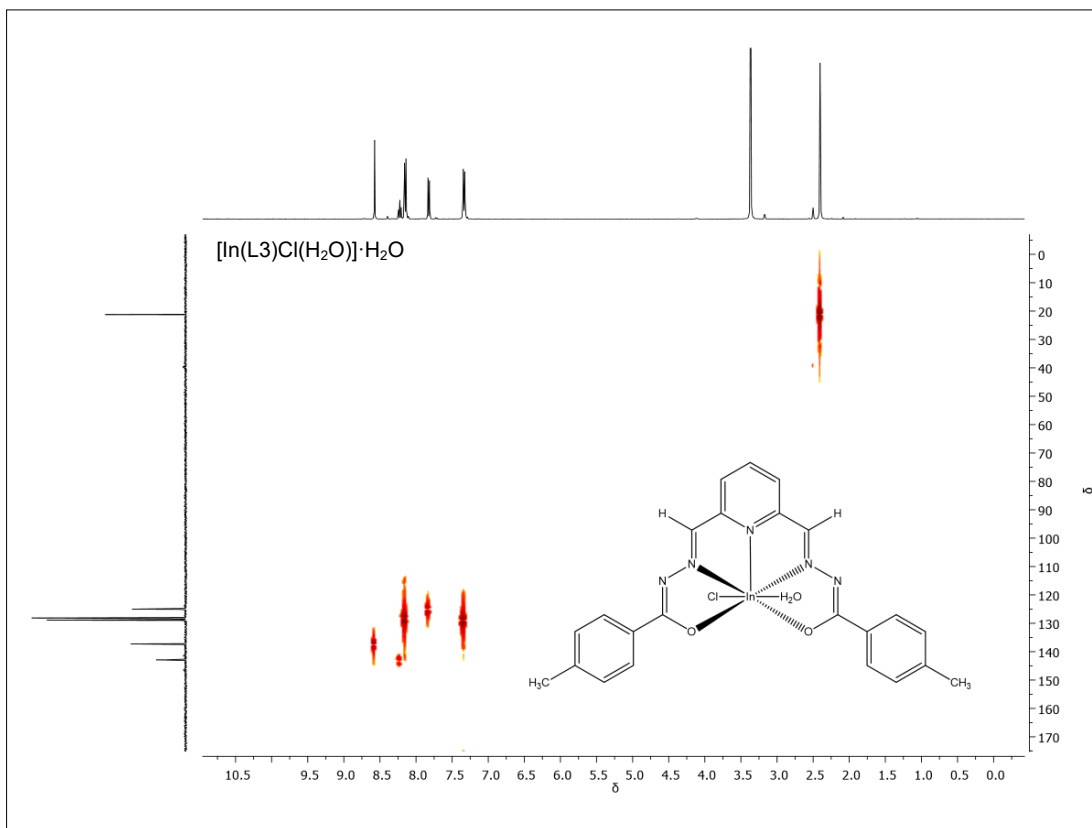

Figure S23. HMPC NMR spectrum of complex [In(L3)Cl(H<sub>2</sub>O)]·H<sub>2</sub>O (3)

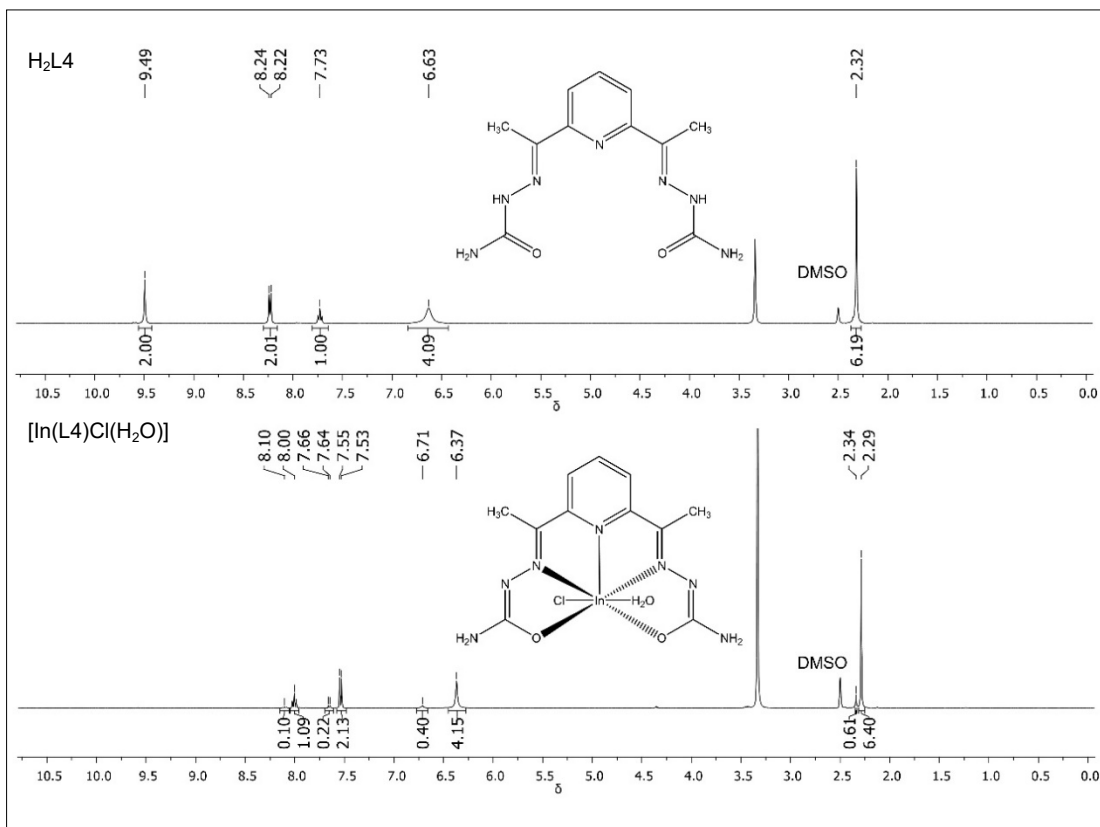

Figure S24. <sup>1</sup>H NMR spectra of H<sub>2</sub>L4 and complex [In(L4)Cl(H<sub>2</sub>O)] (4)

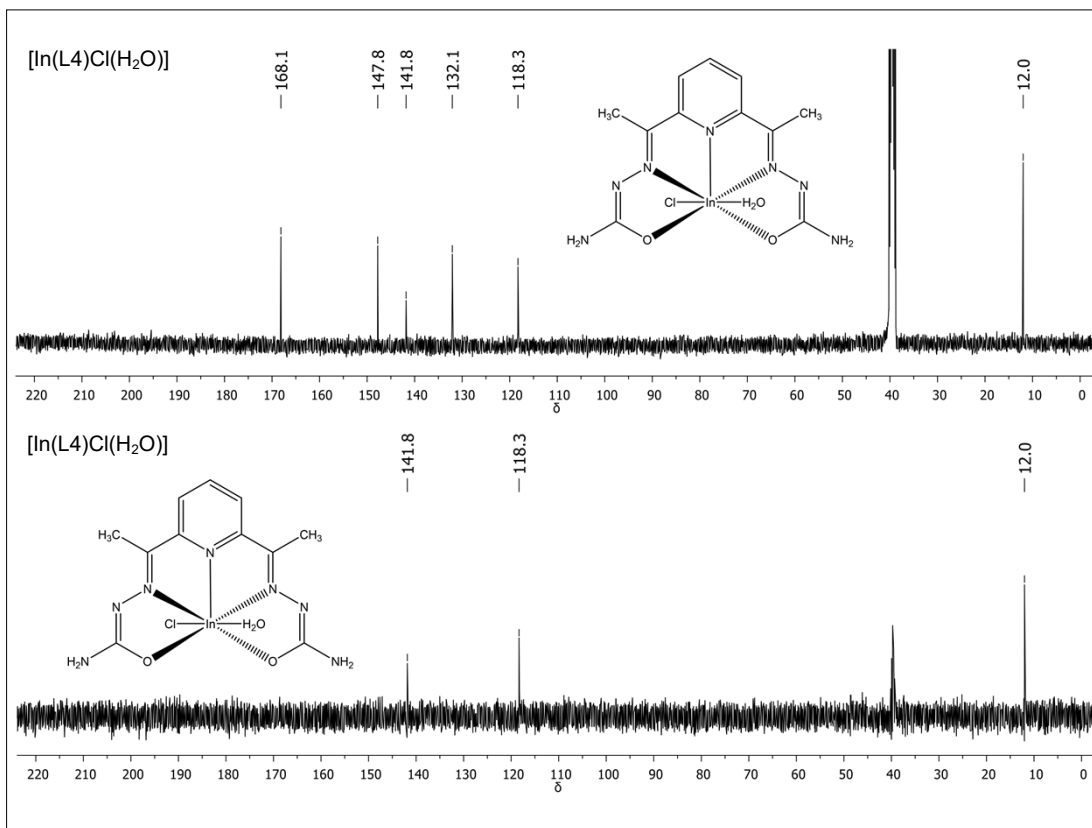

**Figure S25.**  $^{13}\text{C}\{^1\text{H}\}$  and DEPT-135 NMR spectra of complex  $[\text{In}(\text{L4})\text{Cl}(\text{H}_2\text{O})]$  (**4**)

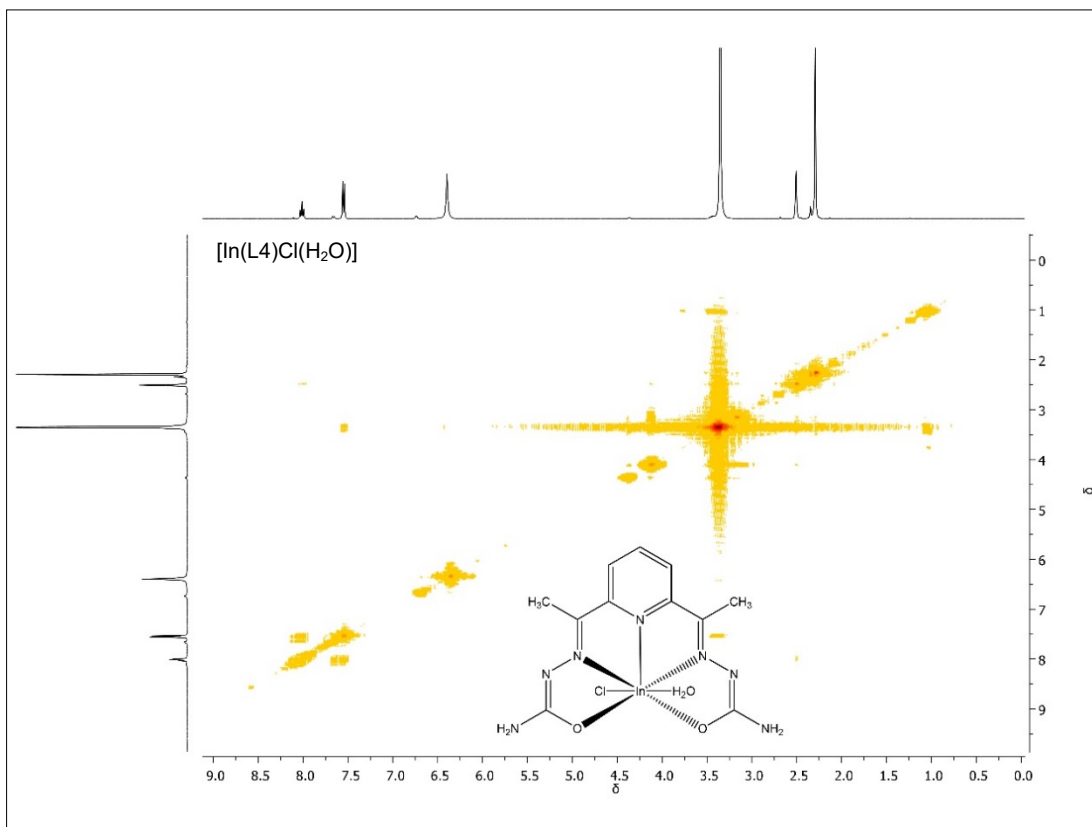

**Figure S26.** COSY NMR spectrum of complex  $[\text{In}(\text{L4})\text{Cl}(\text{H}_2\text{O})]$  (**4**)

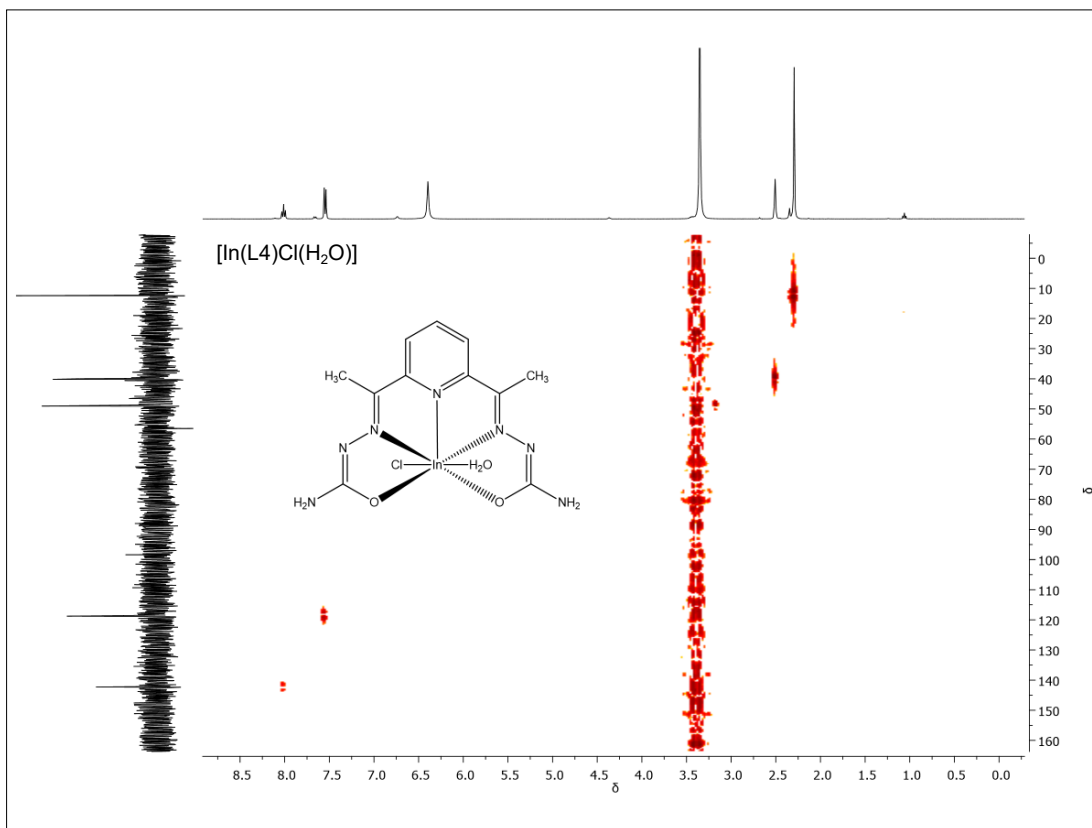

Figure S27. HMQC NMR spectrum of complex [In(L4)Cl(H<sub>2</sub>O)] (4)

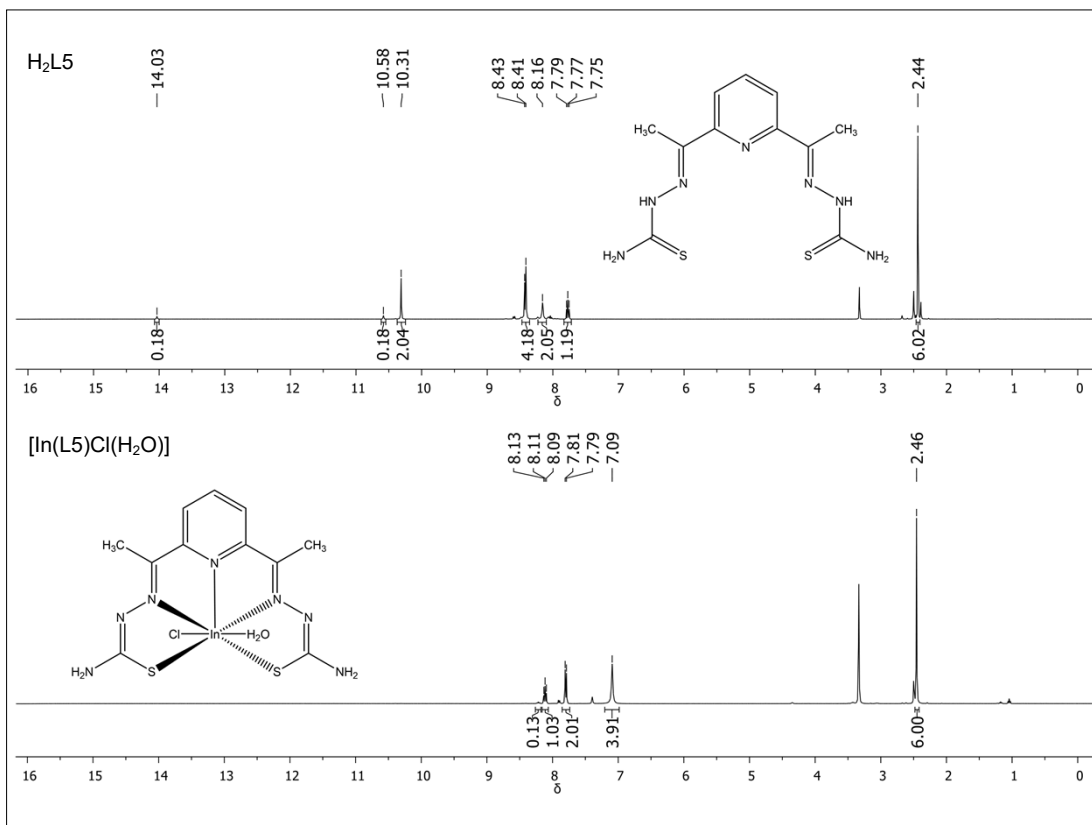

Figure S28. <sup>1</sup>H NMR spectra of H<sub>2</sub>L5 and complex [In(L5)Cl(H<sub>2</sub>O)] (5)

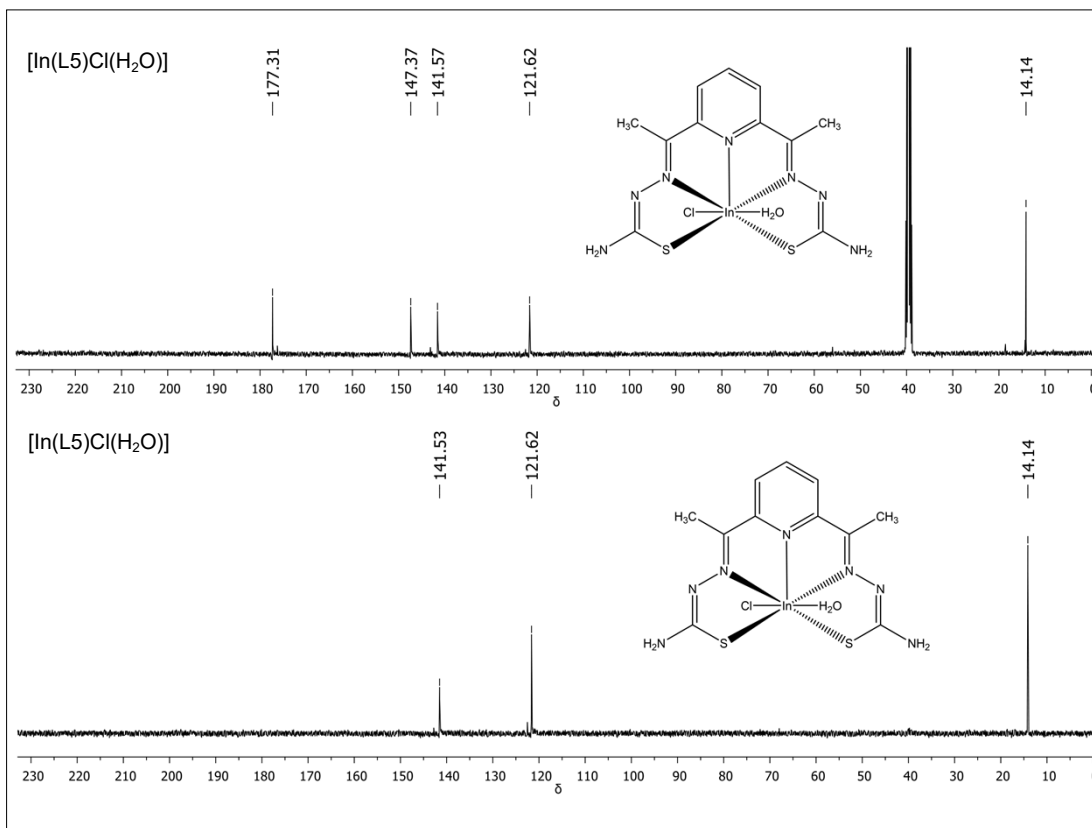

**Figure S29.**  $^{13}\text{C}\{^1\text{H}\}$  and DEPT-135 NMR spectra of complex  $[\text{In}(\text{L5})\text{Cl}(\text{H}_2\text{O})]$  (**5**)

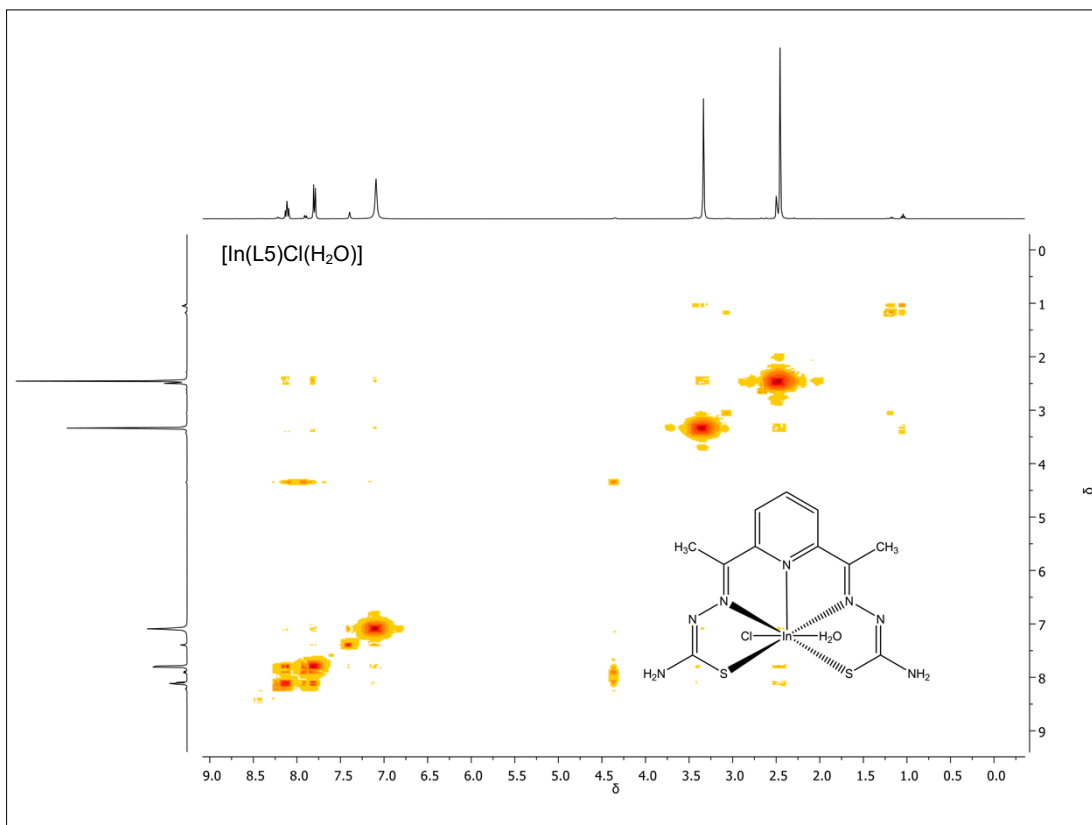

**Figure S30.** COSY NMR spectrum of complex  $[\text{In}(\text{L5})\text{Cl}(\text{H}_2\text{O})]$  (**5**)



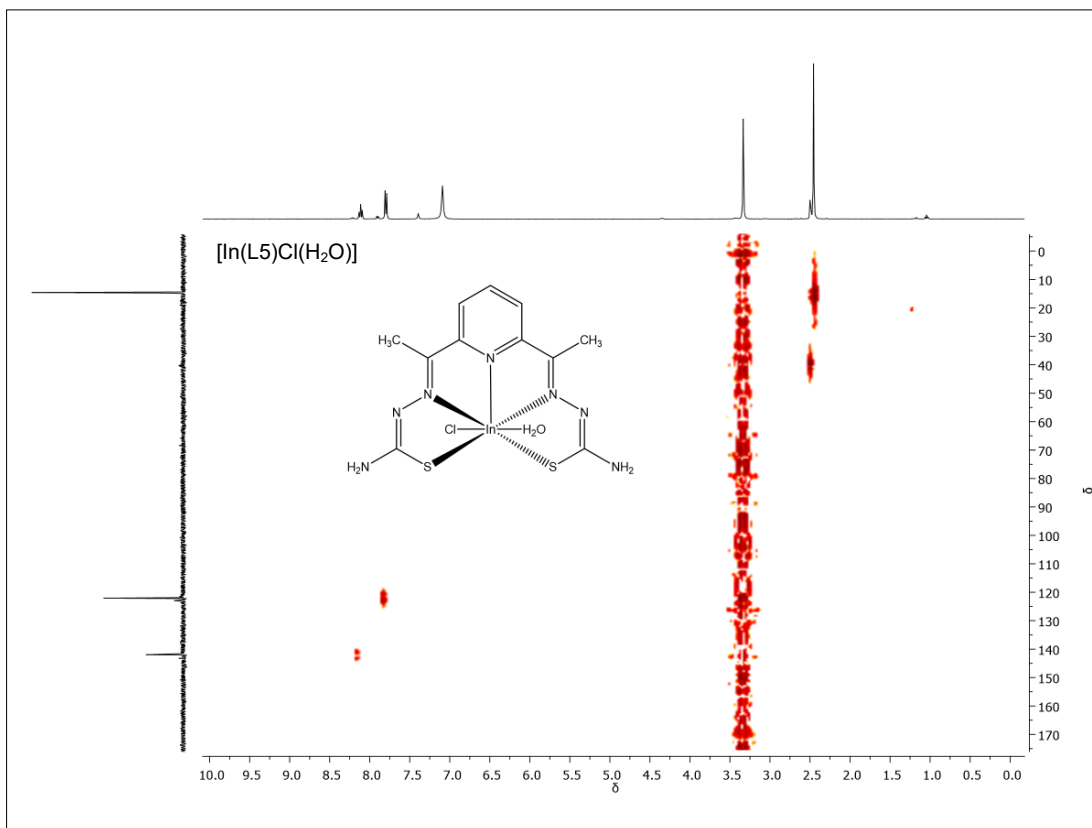

Figure S31. HMQC NMR spectrum of complex [In(L5)Cl(H<sub>2</sub>O)] (5)

### MALDI-TOF Mass spectra

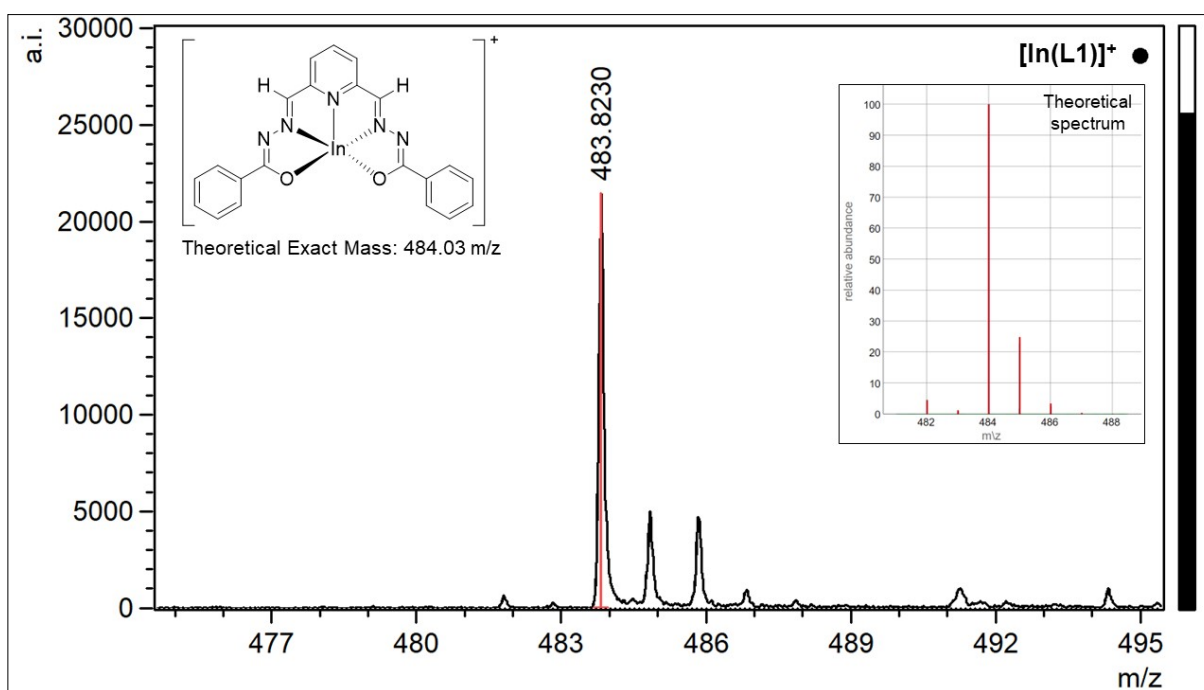

Figure S32. MALDI-TOF spectrum of complex [In(L1)Cl(H<sub>2</sub>O)] (1)

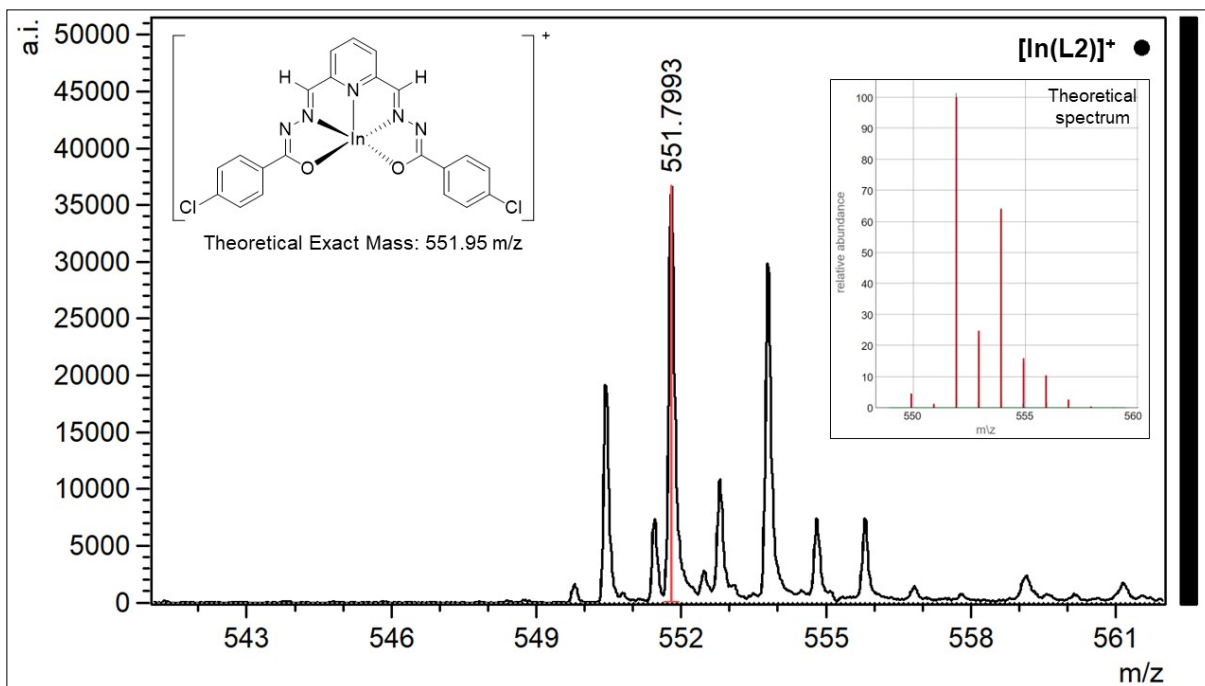

**Figure S33.** MALDI-TOF spectrum of complex  $[\text{In}(\text{L}2)\text{Cl}(\text{H}_2\text{O})] \cdot 3\text{H}_2\text{O}$  (2)

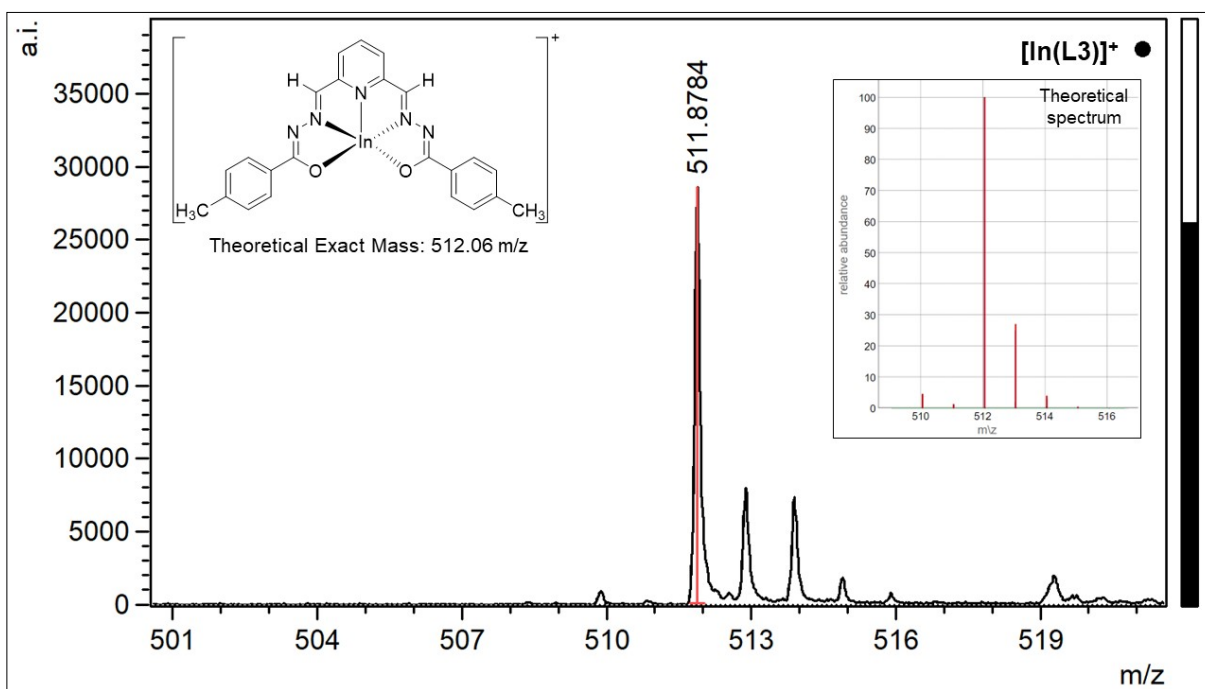

**Figure S34.** MALDI-TOF spectrum of complex  $[\text{In}(\text{L}3)\text{Cl}(\text{H}_2\text{O})] \cdot \text{H}_2\text{O}$  (3)

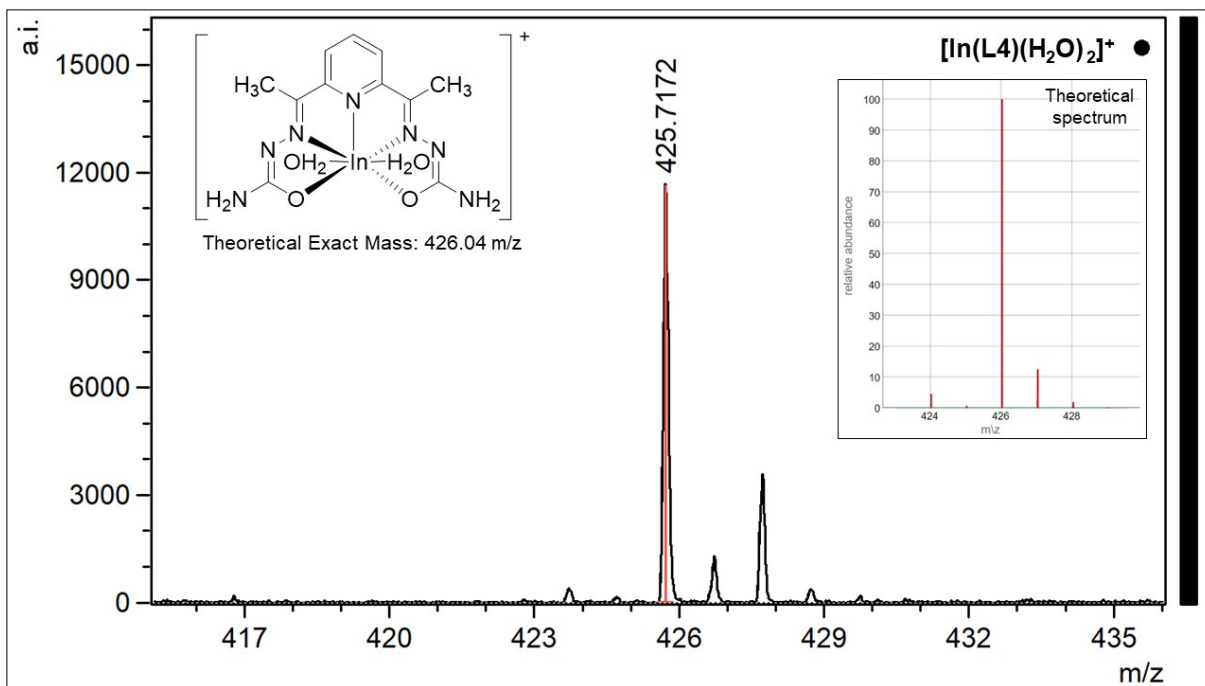

**Figure S35.** MALDI-TOF spectrum of complex  $[\text{In}(\text{L4})\text{Cl}(\text{H}_2\text{O})]$  (4)

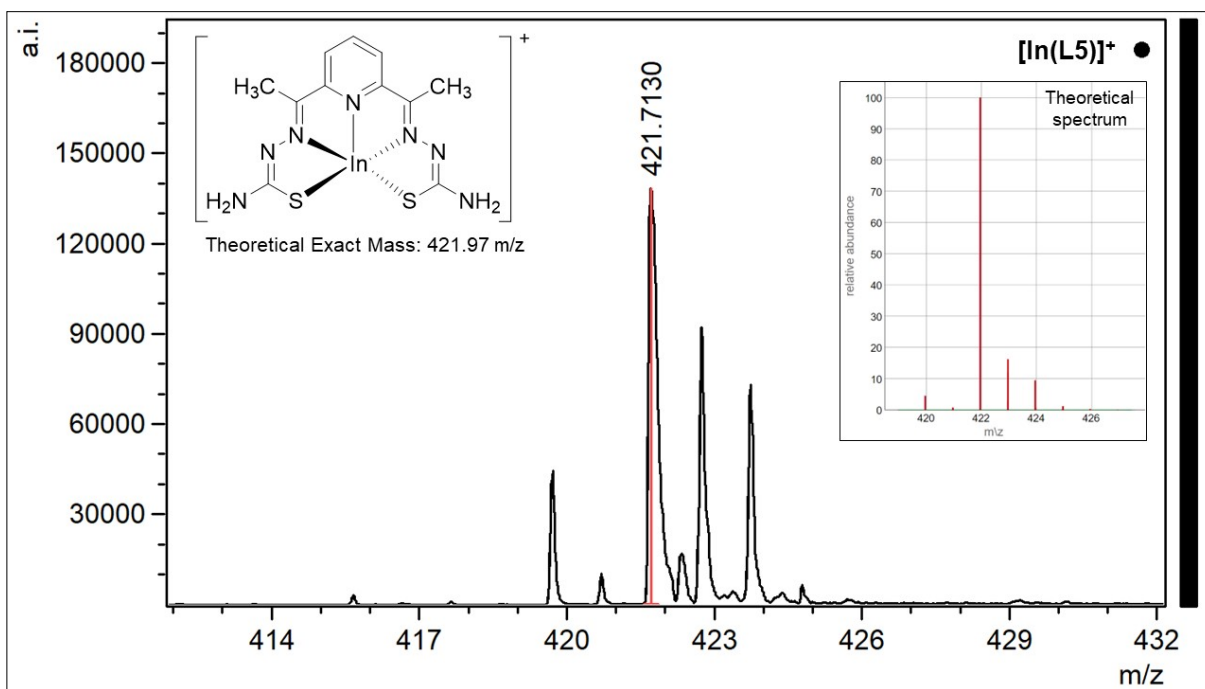

**Figure S36.** MALDI-TOF spectrum of complex  $[\text{In}(\text{L5})\text{Cl}(\text{H}_2\text{O})]$  (5)

### Stability studies in PBS/DMSO solution

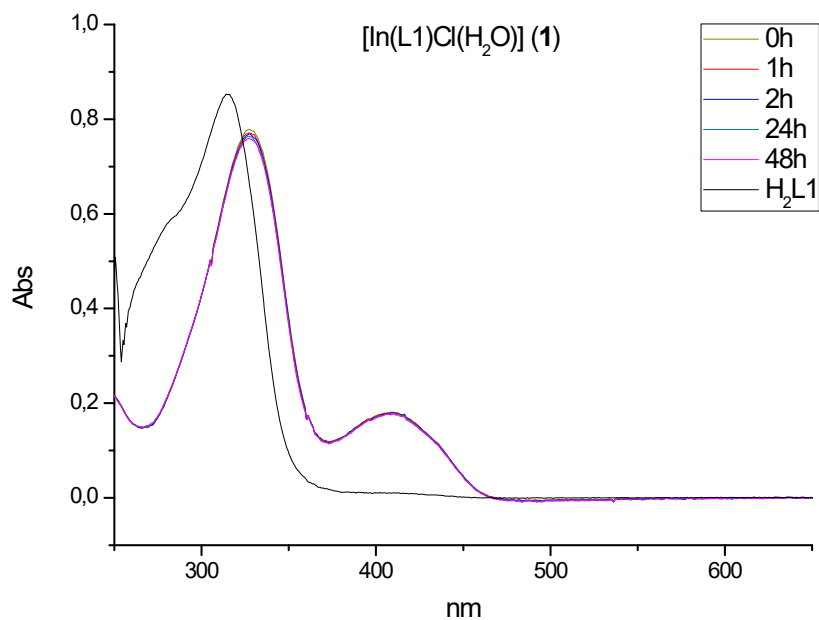

**Figure S37.** UV-vis absorption spectra as a function of time, of  $\text{H}_2\text{L1}$  and complex **1** at  $2 \times 10^{-5}$  mol/L in 2% DMSO / PBS buffer, pH = 7.4.

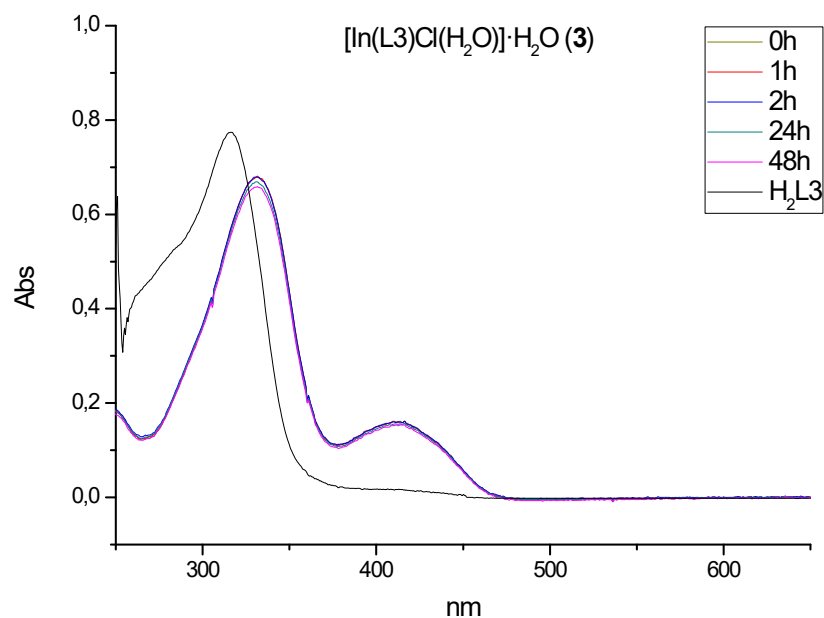

**Figure S38.** UV-vis absorption spectra as a function of time, of  $\text{H}_2\text{L3}$  and complex **3** at  $2 \times 10^{-5}$  mol/L in 2% DMSO / PBS buffer, pH = 7.4.

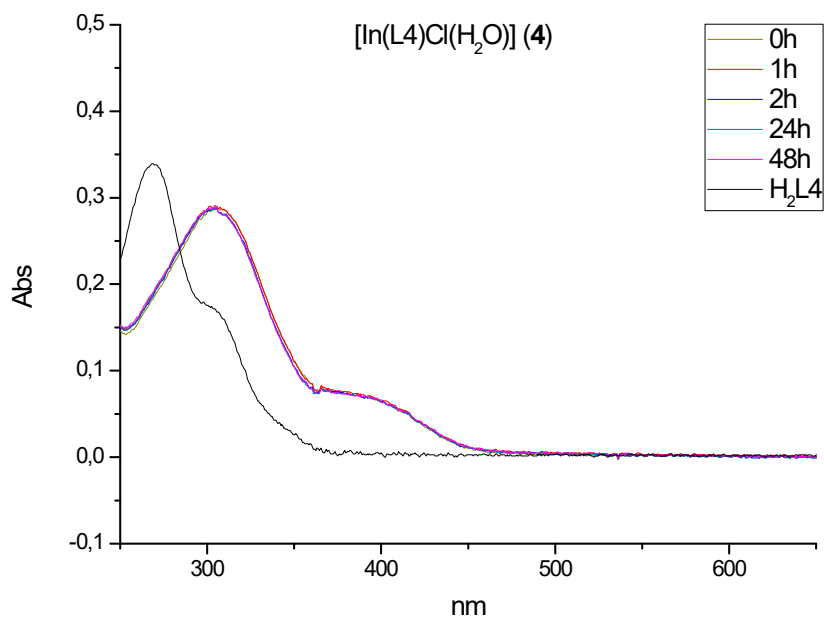

**Figure S39.** UV-vis absorption spectra as a function of time, of  $\text{H}_2\text{L4}$  and complex **4** at  $2 \times 10^{-5}$  mol/L in 2% DMSO / PBS buffer, pH = 7.4.

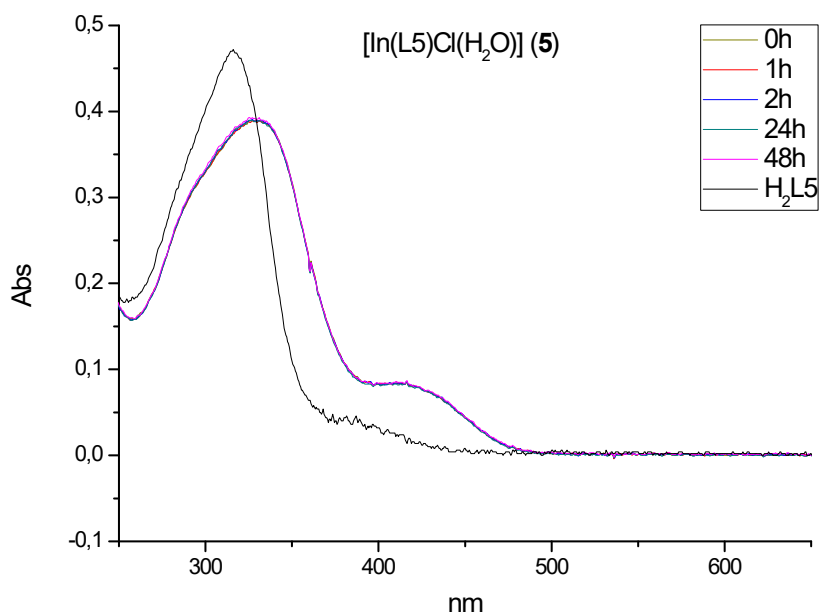

**Figure S40.** UV-vis absorption spectra as a function of time, of  $\text{H}_2\text{L5}$  and complex **5** at  $2 \times 10^{-5}$  mol/L in 2% DMSO / PBS buffer, pH = 7.4.

**Table S1. Comparison of radiochemotherapy, <sup>114m</sup>In(III) radiation monotherapy, combined In(III) chemotherapy + radiation monotherapy, in MCF-7 and MDA-MB-231 breast cancer cells.**

| <b>MCF-7</b>             |                             |             |                                                         |                         |                      |              |              |              |
|--------------------------|-----------------------------|-------------|---------------------------------------------------------|-------------------------|----------------------|--------------|--------------|--------------|
| Concentration<br>(mol/L) | <b>Radionuclide therapy</b> |             |                                                         | <b>Combined therapy</b> |                      |              |              |              |
|                          | Compounds                   | Dose<br>nGy | Radiochemotherapy<br><sup>114m</sup> In<br>% Cell Death | Compounds               | Dose<br>% Cell Death |              |              |              |
|                          |                             |             |                                                         |                         | 0 Gy                 | 1 Gy         | 3 Gy         | 6 Gy         |
| -                        | -                           | -           | -                                                       | -                       | -                    | 12.96 ± 2.87 | 25.84 ± 2.53 | 38.09 ± 3.60 |
| 10 <sup>-6</sup>         | <b>*1</b>                   | 0.4         | 40.70 ± 3.74                                            | <b>1</b>                | 24.51 ± 2.86         | 34.76 ± 2.86 | 42.13 ± 2.52 | 45.12 ± 1.45 |
| 10 <sup>-5</sup>         |                             | 4           | 66.35 ± 3.33                                            |                         | 52.08 ± 2.31         | 62.86 ± 1.83 | 69.78 ± 2.26 | 78.16 ± 1.65 |
| 10 <sup>-6</sup>         | <b>*3</b>                   | 0.4         | 37.96 ± 3.33                                            | <b>3</b>                | 13.62 ± 1.19         | 29.13 ± 1.73 | 40.88 ± 2.81 | 46.48 ± 3.49 |
| 10 <sup>-5</sup>         |                             | 4           | 53.54 ± 3.49                                            |                         | 29.78 ± 1.80         | 44.81 ± 2.56 | 56.81 ± 1.65 | 63.91 ± 2.79 |
| 10 <sup>-6</sup>         | <b>*4</b>                   | 0.4         | 25.20 ± 3.00                                            | <b>4</b>                | 12.75 ± 2.19         | 25.80 ± 1.98 | 40.89 ± 1.88 | 53.78 ± 2.02 |
| 10 <sup>-5</sup>         |                             | 4           | 40.03 ± 2.64                                            |                         | 33.81 ± 2.50         | 51.70 ± 1.70 | 63.32 ± 1.48 | 66.20 ± 1.95 |
| 10 <sup>-6</sup>         | <b>*5</b>                   | 0.4         | 54.39 ± 3.09                                            | <b>5</b>                | 25.18 ± 3.70         | 43.76 ± 2.80 | 50.47 ± 2.47 | 53.42 ± 2.51 |
| 10 <sup>-5</sup>         |                             | 4           | 77.30 ± 3.28                                            |                         | 54.05 ± 2.17         | 67.41 ± 2.13 | 79.63 ± 2.97 | 84.71 ± 3.94 |
| <b>MDA-MB-231</b>        |                             |             |                                                         |                         |                      |              |              |              |
| Concentration<br>(mol/L) | <b>Radionuclide therapy</b> |             |                                                         | <b>Combined therapy</b> |                      |              |              |              |
|                          | Compounds                   | Dose<br>nGy | Radiochemotherapy<br><sup>114m</sup> In<br>% Cell Death | Compounds               | Dose<br>% Cell Death |              |              |              |
|                          |                             |             |                                                         |                         | 0 Gy                 | 1 Gy         | 3 Gy         | 6 Gy         |
| -                        | -                           | -           | -                                                       | -                       | -                    | 6.69 ± 1.57  | 12.68 ± 1.54 | 20.92 ± 2.21 |
| 10 <sup>-6</sup>         | <b>*1</b>                   | 0.4         | 30.79 ± 3.47                                            | <b>1</b>                | 19.65 ± 3.76         | 22.57 ± 1.63 | 30.99 ± 2.87 | 44.61 ± 3.92 |
| 10 <sup>-5</sup>         |                             | 4           | 48.44 ± 2.65                                            |                         | 37.06 ± 2.07         | 39.95 ± 1.91 | 47.50 ± 2.78 | 55.98 ± 4.03 |
| 10 <sup>-6</sup>         | <b>*3</b>                   | 0.4         | 26.33 ± 2.49                                            | <b>3</b>                | 14.91 ± 3.16         | 18.20 ± 3.01 | 25.09 ± 2.44 | 35.92 ± 2.33 |
| 10 <sup>-5</sup>         |                             | 4           | 42.99 ± 6.49                                            |                         | 28.35 ± 2.70         | 33.92 ± 3.62 | 39.90 ± 2.10 | 52.01 ± 2.93 |
| 10 <sup>-6</sup>         | <b>*4</b>                   | 0.4         | 25.21 ± 3.00                                            | <b>4</b>                | 12.75 ± 2.19         | 21.95 ± 2.84 | 24.48 ± 3.71 | 35.82 ± 2.99 |
| 10 <sup>-5</sup>         |                             | 4           | 40.03 ± 2.64                                            |                         | 33.81 ± 2.50         | 38.25 ± 1.78 | 44.89 ± 4.00 | 55.77 ± 3.09 |
| 10 <sup>-6</sup>         | <b>*5</b>                   | 0.4         | 37.78 ± 2.57                                            | <b>5</b>                | 16.05 ± 2.85         | 18.11 ± 3.90 | 25.68 ± 1.65 | 36.54 ± 3.36 |
| 10 <sup>-5</sup>         |                             | 4           | 59.40 ± 4.52                                            |                         | 41.37 ± 4.16         | 45.14 ± 2.25 | 57.04 ± 1.73 | 63.25 ± 2.78 |
